## Services in Minoritized Autistic Adolescents and Adults Varying in Language Skills

Teresa Girolamo,<sup>1</sup> Alicia Escobedo,<sup>1</sup> Samantha Ghali,<sup>2</sup> Kyle Greene-Pendelton,<sup>3</sup> Iván Campos,<sup>4</sup>

Poornima Ram-Kiran<sup>5</sup>

<sup>1</sup>School of Speech, Language, and Hearing Sciences, San Diego State University, <sup>2</sup>Child Language Doctoral Program, University of Kansas, <sup>3</sup>Consolidated School District of New Britain,

<sup>4</sup>California Association of Health and Education Linked Professionals, JPA; <sup>5</sup>Department of Speech and Hearing Sciences, University of Washington

### Author Note

**Corresponding author:** Teresa Girolamo,  
School of Speech, Language, and Hearing Sciences  
5201 Campanile Mall  
San Diego, CA, 92103  
tgirolamo@sdsu.edu  
619-594-7747

**Authors:** Alicia Escobedo, [aescobedo4259@sdsu.edu](mailto:aescobedo4259@sdsu.edu)  
Kyle Greene-Pendelton, [kyle@sankofaspeech.com](mailto:kyle@sankofaspeech.com)  
Samantha Ghali: [samantha.ghali@ku.edu](mailto:samantha.ghali@ku.edu)  
Iván Campos, [icamposslp@gmail.com](mailto:icamposslp@gmail.com)  
Poornima Ram-Kiran, [prk14@uw.edu](mailto:prk14@uw.edu)

**Disclosures:** The authors have no conflicts of interest.

**Acknowledgements:** TG was supported by an American Speech-Language-Hearing Foundation New Investigators Research Grant (PI: Girolamo).

## Abstract

**Background:** Racially and ethnically minoritized autistic individuals face intersectional disparities in access to services and research representation. Prior work tends to overlook individual preferences, lived expertise, and the of language skills in services. To address this gap, this community-based participatory study examines the presence and correlates of services in minoritized autistic adolescents and adults varying in language skills.

**Method:** Participants ( $N = 73$ , ages 13-30, >50% with language scores  $\leq -1.25 SD$  and ~30% with NVIQ < 70 to 84) completed a behavioral assessment protocol. Participants and caregivers completed questionnaires. Descriptive and regression analyses evaluated patterns and predictors of number of services received, unmet needs, and barriers.

**Results:** Participants received multiple services yet had multiple unmet service needs and barriers. Effects of individual differences and social-ecological variables on services received, unmet needs, and barriers varied in presence and magnitude when using a categorical versus continuous approach to individual differences.

**Implications:** While the number of services received and unmet needs were similar to prior work, examination of individual services, unmet needs, and barriers suggested differences. Effects point to nuance in experiences during the transition to adulthood and motivate use of participatory approaches to build the evidence base informing practice and advocacy.

**Keywords:** services, autism, transition to adulthood

**Learning outcomes:** After reading the article, the learner will be able to: 1) summarize knowledge gaps about access to services; 2) explain why evidence-based practice motivates use of a community-based participatory approach; and 3) describe implications of study findings for clinicians and autistic individuals.

### **Services in Minoritized Autistic Adolescents and Adults Varying in Language Skills**

In the United States, autism has a higher diagnosed prevalence in Black, Hispanic or Latine, and Asian or Pacific Islander youth than white youth (1 in 29 to 34 versus 1 in 41) (Maenner et al., 2023). While racial and ethnic disparities in diagnosis have been reduced (Durkin et al., 2017; Mandell et al., 2002, 2007; Shaw et al., 2022), disparities in services persist (Eilenberg et al., 2019; Liu et al., 2023; Rast et al., 2023; Smith et al., 2020). This inequity has cascading impacts. Autistic adults lose access to child- and education-based services in the transition to adulthood ("Every Student Succeeds Act [ESSA]," 2015; "Individuals with Disabilities Education Improvement Act [IDEIA] of 2004," 2018), including speech-language services (Laxman et al., 2019), and report greater unmet service needs (Anderson et al., 2018; Turcotte et al., 2016). This loss not only puts adults at risk of poor outcomes (Howlin & Magiati, 2017), but also is higher for racially and ethnically minoritized adults (Schott et al., 2022) and adults with language impairment (Johnson et al., 2010). Given the prevalence of autism and of co-occurring structural language impairment (>50%) (Boucher, 2012), which includes challenges with phonology and/or morphosyntax (Schaeffer et al., 2023), reducing disparities is critical and motivates understanding access to services inclusive of race and language skills.

Challenges to understanding services access include systematic exclusion of minoritized autistic individuals from research (Maye et al., 2021) and of dimensional approaches to characterize individual differences, particularly when considering language performance across linguistic domains (Kover & Abbeduto, 2023). Both inclusion and nuanced research methods are needed for broadly replicable findings (National Institutes of Health, 2021) and to enhance access to services (National Institute on Deafness and Other Communication Disorders, 2022). Ways to reduce this bias are: 1) evidence-based practice, which integrates individual preferences,

expert opinion, and the best-available evidence (Sackett et al., 1996), and 2) community-based participatory research, which provides a framework for partnering with individuals and experts (Wallerstein & Duran, 2006). This study uses these methods to examine services access, unmet needs, and barriers in minoritized autistic adolescents and adults.

### **Conceptualizing Expert Opinion and Partnership**

There are two considerations in approaching services in minoritized autistic individuals. First, to identify who is an expert, services and diversity must be contextualized. Second, to integrate expert opinion, partnership must be responsive to the intersection of race and disability.

#### ***Contextualizing Services and Diversity***

Multiple levels of environment shape individual experiences (Bronfenbrenner, 1977). These impacts are especially relevant for minoritized autistic individuals. For instance, U.S. law codified racial and disability-based segregation (Powell, 2012; Turnbull & Turnbull, 1998), leading to disparities regardless of individual differences (Crenshaw, 1989). Structural changes to end segregation, such as *Brown v. Board of Education* (1954), resulted from changes in social perceptions about disability and race; it was not that minoritized or autistic individuals changed (Powell, 2012). Thus, racial disparities are often due to social processes – and not, as prior work has suggested (Burke & Heller, 2017), due to race or ethnicity themselves. Dis/Ability Studies and Critical Race Theory (DisCrit) makes this relationship clear by framing race and dis/ability as mutually reinforcing social constructs that lead to nuanced social marginalization (Annamma et al., 2013). Further, Diversity Science underlines the importance of examining heterogeneity within minoritized individuals, as there is no one-to-one ratio between race, disability, or experiences (Plaut, 2010). In all, environment and heterogeneity are each important for understanding services and point to who is an expert: individuals with lived, personal, and

professional experiences in autism, racial and ethnic minoritization, and services.

### *Nuances in Partnership*

A next step to build the evidence base is to integrate expert opinion (Burns et al., 2011), which can be achieved through community-based participatory research (Wallerstein & Duran, 2010). Yet even with attention to participatory methods in autism research (Fletcher-Watson et al., 2019), high-level dialogue makes clear intersectional nuances are not a focus. Research trends to encourage partnership include advisory boards (Williams et al., 2023) and community involvement statements in journal articles (Autism, 2024), each of which involve disclosure. Some autistic adults prefer to keep diagnosis private and fear discrimination (Romualdez et al., 2021; Thompson-Hodgetts et al., 2020), a grave concern for minoritized individuals (Annamma, 2018). For example, if a community member co-authors a manuscript, they may feel pressured to disclose their diagnosis by a journal seeking to be transparent about the inclusion of autistic individuals in research (Oswald, 2024). This is problematic, because there is no guarantee of confidentiality or nondiscrimination, such as when an editorial board member who reviews a manuscript violates journal policies and professional ethics by sharing confidential information about minoritized autistic authors with a healthcare provider network. Without action, these practices work against partnership and amount to diversity dishonesty (Wilton et al., 2020). To support power-sharing (Wallerstein et al., 2019), research must be responsive to nuances in partnership versus checking a box (Plaut, 2010).

### *Summary*

Appreciating services in minoritized autistic adolescents and adults involves social processes underlying individual experiences and guides identification of experts to partner with in research. In turn, partnering with experts means attending to nuance versus broad guidelines.

## **Evidence on Services for Minoritized Autistic Adolescents and Adults**

### *Presence and Nature of Services*

The third part of building the evidence base involves determining the best-available evidence (Sackett et al., 1996). Studies on services in autistic adolescents and adults primarily use caregiver report to assess services received, unmet needs, and barriers; see Supplementary Tables 1 to 3. Samples were primarily non-Hispanic white (77% to 93.6%) and male (71.8% to 85.8%), with varying rates of intellectual disability (17% to 58.8%). When reported, the number of services received differed: 0 of 4 in 39.1% of post-secondary adults (ages 19 to 23) (Shattuck et al., 2011), 3.05 of 16 in high school seniors (ages 17 to 22) (Taylor & Henninger, 2015), and 6.13 of 15 in adolescents and adults (ages 16 to 30) (Ishler et al., 2022). Commonly received services were mental health (35% to 62.6%) and disability-related medical services (18% to 65.5%). Unmet service needs varied, ranging from 1.85 of 16 (Taylor & Henninger, 2015) to 3.18 of 15 (Ishler et al., 2023), and pertained to entering adulthood: occupation or life skills therapy (14% to 33.3%) and vocational skills or training (33.3% to 35.9%). Individual barriers centered on access: location (15.5% to 33.3%), availability (15.5% to 49.3%), and cost (15.3 to 38.5%). Overall, there was diversity in both measurement and services outcomes.

### *Factors in Services Received, Unmet Needs, and Barriers*

To explain services, studies examined sociodemographics, individual differences, and social-ecological factors. While important, approaches did not center heterogeneity.

**Sociodemographics.** Effects of race, ethnicity, sex, and gender on services were inconsistent. Findings included: no effects of race or ethnicity on services received (Ishler et al., 2022) or barriers (Ishler et al., 2023); higher likelihood of receiving no services in Black youth (OR = 3.33) and “other or mixed” youth (OR = 1.30) than white youth (Shattuck et al., 2011);

and three more unmet service needs for “other” youth or Black youth versus white non-Hispanic youth (Taylor & Henninger, 2015). These patterns are based on comparisons of white versus minoritized (Ishler et al., 2022, 2023; Laxman et al., 2019; Song et al., 2022; Taylor & Henninger, 2015; Turcotte et al., 2016), with varying definitions of “minoritized.” One report defined “underrepresented minority race/ethnicity” as Black, Hispanic, or multiracial (Ishler et al., 2022), while another report on the same sample additionally included Native American or Alaska Native under “historically marginalized minority race/ethnicity” (Ishler et al., 2023). Effects of sex at birth or gender were also limited by incomplete reporting, such as reporting only males or not specifying use of gender or sex (Shattuck et al., 2011; Taylor & Henninger, 2015). Beyond running counter to federal guidelines for health disparity populations (Office of Management and Budget [OMB], 2024) and current guidelines (American Psychological Association [APA], 2019; Flanagan et al., 2021), these practices hinder the interpretation of sociodemographic patterns and do not provide a sufficient basis for understanding heterogeneity.

**Individual Differences.** There was no one effect of adaptive behavior, autism traits, or co-occurring diagnoses on services. In some cases, adaptive behavior was tied to services received: (a) scores  $< -2 SD$  predicted 1.5 more services received (Taylor & Henninger, 2015); (b) each one-unit  $SD$  higher on an adaptive behavior measure predicted 0.77 fewer services received (Ishler et al., 2022); and (c) higher functional mental skills predicted lower likelihood of receiving case management (OR = 0.22 to 0.25) or medical services (OR = 0.43 to 0.66) (Shattuck et al., 2011). Elsewhere, adaptive behavior did not predict unmet service needs (Taylor & Henninger, 2015) or barriers (Ishler et al., 2023). Of note is that for minoritized autistic individuals, racism and discrimination shape individual decision-making processes (e.g., going out with friends as a Black man – let alone an autistic man with language impairment – may not

be safe regardless of individual ability) (Girolamo et al., under review). Therefore, adaptive behavior may not always be a meaningful correlate. Effects of co-occurring diagnoses were also mixed. On one hand, psychiatric disorders vary widely. Yet even when considering just intellectual disability, there was: increased likelihood (OR = 1.75) (Laxman et al., 2019) or no effect on services received (Ishler et al., 2022; Taylor & Henninger, 2015), as well as no effect on barriers (Ishler et al., 2023) or unmet needs (Laxman et al., 2019). One study found no effect of language on services received but defined “severe language impairment” as caregivers reporting adult “has a lot of trouble speaking clearly” or “doesn’t speak at all” and equated “severe language impairment” with “nonverbal” (Shattuck et al., 2011). Examination of autism traits was limited, finding no effects on services received or unmet needs (Taylor & Henninger, 2015). In all, these mixed patterns point to the importance of heterogeneity.

**Social-Ecological Factors.** Educational enrollment and socioeconomic status (SES) on services have varied findings. High school enrollment predicts services received ( $sr^2 = 0.12$ ) (Ishler et al., 2022). Yet, services received decrease and unmet service needs increase in adolescence (Turcotte et al., 2016), such that exiting high school alone may not impact services received (Laxman et al., 2019) and barriers may be constant (Ishler et al., 2023). At the same time, high school exit predicts more unmet service needs (OR = 1.37) (Laxman et al., 2019), including speech-language and other services often provided by public education (Song et al., 2022). Thus, even as services decline into adolescence, educational enrollment may be important. Effects of SES, as assessed by income, are inconsistent. Lower income has been tied to more unmet service needs (Laxman et al., 2019) and fewer services received (Shattuck et al., 2011), but elsewhere, has had no effects on services received, barriers (Taylor & Henninger, 2015), or extent of barriers (Ishler et al., 2023). One note is income does not account for individual needs.



In contrast, family financial burden predicted access barriers to services ( $sr^2 = .04$ ) (Ishler et al., 2023). Such barriers limit opportunities for community participation and point to the relevance of sense of community as a social-ecological factors (Cameron et al., 2022). Contextualizing the environment is important to understanding services.

### ***Summary***

Studies to date on services received, unmet needs, and barriers document broad patterns yet are insufficient for understanding nuance. Given relevant theory (Annamma et al., 2013; Plaut, 2010), incorporating individual differences in language, social-ecological factors, and expert opinion are needed to provide best-available evidence on services in minoritized autistic adolescents and adults.

### **The Current Study**

This study took a community-based participatory approach to examine services in minoritized autistic adolescents and adults varying in language skills. We asked:

- 1) What are patterns in services received, unmet service needs, and barriers to having service need met?
- 2) To what extent are services received, unmet service needs, and barriers to services, predicted by individual differences (language skills, autism traits, NVIQ) and social-ecological variables (educational enrollment, sense of community), and how do effects compare when using a categorical versus continuous approach to individual differences?

### **Method**

This study received institutional board approval and followed all ethical guidelines.

### **Procedures**

#### ***Participatory Approach***

Individuals who were not participants came together to discuss intersectional disparities in research and practice based on their lived, personal, and professional experiences. The initial aim of these discussions was to address community needs (e.g., conducting language assessment to provide access to services). These discussions led to community members suggesting a research project on services would support advocacy for their communities and expressing an interest in becoming partners. By nature of discussions, the team agreed upon use of DisCrit (Annamma et al., 2013) and Diversity Science (Plaut, 2010).

To support power sharing (Wallerstein et al., 2019), the team co-developed norms. One was autonomy in how members represented themselves, versus prescribing identities to them (Plaut, 2010; Romualdez et al., 2021). For instance, in a separate situation, a white investigator emailed a team member and invited them to be a community advisory board member on the basis of wanting autistic people “with one other identity,” which was tokenizing (Maye et al., 2021). For other members, intersectional discrimination led to coming into contact with the criminal justice system and professional harm, impacting how they publicly shared information about their diagnoses (Annamma, 2018). Thus, the team did not use public statements and honored individual preferences for public team affiliation.

A second norm was mutual benefit to partners beyond this project, as several partners recounted multiple unethical situations where senior researchers were eager to partner with community members for the researchers’ sole gain. For example, two members shared incidents when senior researchers approached each of them to participate on generously-funded grants, but the following occurred: 1) the senior researcher demanded a letter of support from the community member, which entailed the member completing a substantial amount of work with no offer of compensation, and 2) the senior researcher paid advisory board consultants \$200 for

five years of work, while failing to notify them they paid faculty consultants over \$200 per hour. Thus, the first author met with community partners to develop a plan for supporting them in their goals (e.g., identifying project skills and tasks to support career pathways), leverage resources to support partners in their work (e.g., organizational and writing skills), and write proposals with transparency in budgeting and compensation of partners at or above the same rate as researchers.

The third norm was accessibility. Based on individual profiles, activities took place in multiple modalities and leveraged strengths. For example, if a team member indicated written text was inaccessible, while verbal conceptual insight was a strength, they met with another member to review information and provide insight verbally. Accessibility also involved flexible scheduling and transparency on the research process, including what to expect and team roles.

### *Selection Criteria*

The partners above were not participants in this study. Selection criteria of participants were: (a) racially minoritized and/or ethnically minoritized per U.S. Census guidelines; (b) formal clinical diagnosis of autism, per requirements for inclusion in recruitment sources, and independent confirmation using the Social Responsiveness Scale-2<sup>nd</sup> Ed. (SRS-2) (Constantino, 2012) and expert clinical judgment; (c) ages 13 to 30, coinciding with approximately when transition planning begins in many states within the U.S. and 10 years post-federal eligibility for special education services (ESSA, 2015); (d) proficiency in English per self-report during screening, as assessments were in English; (e) adequate hearing and vision thresholds for responding to audiovisual stimuli on a computer screen, and; (f) use of primarily spoken language to communicate, as study activities required listening to and producing language responses. Selection criteria for caregivers were: (a) active caregiving role for autistic participants; (b) proficiency in English, as interviews were completed in English; and (c)

adequate hearing and vision thresholds for completing study activities.

### ***Recruitment***

Recruitment took place in a multi-step process: (a) sharing study flyers with community and advocacy organizations serving minoritized autistic adolescents and adults by email, (b) providing consultation to individuals and families about the study in their modality of choice (phone, Zoom, email), (c) obtaining informed consent using a dynamic process, and (d) collecting data. Recruitment and data collection took place from 2022 to 2023 remotely on HIPAA-compliant Zoom, using a stopping rule of  $N = 68$ . The first author administered an assessment protocol, including questionnaires, to participants and caregivers.

### **Measures**

#### ***Sociodemographics***

To characterize the sample, this study collected participant race, ethnicity, sex assigned at birth, and gender; see Table 1. Respondents selected one or more options for race per U.S. Census categories (OMB, 2024), and could write in options. Race, ethnicity, and gender were excluded from analysis, as they are complex constructs beyond the scope of this study (APA, 2019). Sex was also excluded, as studies tend to aggregate sex assigned at birth and gender (Halladay et al., 2015).

#### ***Individual Difference Measures***

**Language.** Participants completed normed assessments across language domains (Girolamo et al., 2023b; Magiati et al., 2014), which align with clinical practice patterns for service eligibility (Burke et al., 2023; Selin et al., 2022); see Table 2. Overall receptive-expressive language was assessed by the Clinical Evaluation Language Fundamentals-5<sup>th</sup> Ed., normed up to age 21 (Wiig et al., 2013). Age 21 norms were used for participants over age 21,

per prior work on adults ages 18 to 49 (Botting, 2020; Clegg et al., 2021; Fidler et al., 2011).

Receptive and expressive vocabulary were assessed by the Peabody Picture Vocabulary Test-5<sup>th</sup> Ed. (Dunn, 2019) and Expressive Vocabulary Test-3<sup>rd</sup> Ed. (Williams, 2019). Nonword repetition was assessed by percent accuracy on the Syllable Repetition Task (Shriberg et al., 2009).

**NVIQ.** Nonverbal ability was assessed using the Raven's Progressive Matrices-2<sup>nd</sup> Ed. (Raven et al., 2018). The Raven's does not use language, which yields nearly 1 *SD* higher scores in autistic individuals with language impairment than measures of verbal IQ (Grondhuis et al., 2018). For each item, participants select one of five images to complete a visual stimulus.

**Autism Traits.** Autism traits were measured using the SRS-2, which has caregiver and self-report forms for students and adults (Constantino, 2012). Respondents indicate the frequency of 65 items on a four-point scale. Item-level scores provide restricted and repetitive behaviors, social communication impairment, and overall *t*-scores.

### ***Social-Ecological Factors***

**Sense of Community.** The Brief Sense of Community Scale is a validated scale for diverse youth and adults (Cardenas et al., 2021; Lardier Jr et al., 2022; Lardier Jr et al., 2018; Opara et al., 2021; Peterson et al., 2008). Respondents rate eight statements from strongly disagree to strongly agree on a five-point scale. Higher scores indicate higher sense of community. Item-level scores are averaged to provide an overall score.

**Educational Enrollment Status.** Respondents reported if participants were enrolled in educational programming, and if applicable, type of programming (e.g., junior high, high school, specialized high school program, college courses, post-secondary program, other).

### ***Services Received, Unmet Service Needs, and Barriers to Services***

Per Taylor and Henninger (2015), services were measured using items from the NLTS-2

(Newman et al., 2011) plus two additional items: insurance not accepted and physical accessibility. Respondents selected if they received each of 16 services; if services not received were unmet needs; and if each of 12 items were barriers to having service needs met; see Table 3 for services and unmet needs and Table 4 for barriers. Services received and unmet needs included “other,” with a write-in option. No response under “other” had more than one service.

### **Data Processing**

Two research assistants independently scored and checked measures. All disagreements were discussed until consensus was reached. NVIQ was auto-scored within its testing platform. Data were checked for missingness and replaced using predictive mean matching with one imputation in SPSS 29 (IBM Corp., 2023; Little & Rubin, 2019): language and NVIQ scores ( $n = 1$ ; did not complete assessment); SRS-2 scores ( $n = 2$ ;  $n = 1$  missing form,  $n = 1$  did not complete the SRS-2); and educational programming ( $n = 1$ ; did not answer question). For the categorical approach, data were coded as follows: a) language impairment as  $\leq -1.25 SD$  on  $\geq 2$  measures: CELF-5 Receptive Language Index, CELF-5 Expressive Language Index, SRT percent accuracy, PPVT-5 standard score, EVT-3 standard score (Girolamo & Rice, 2022; Tomblin et al., 1997); b) intellectual disability as  $NVIQ < 70$  (American Psychiatric Association, 2013); and high levels of autism traits as  $SRS-2$  total  $t$ -scores  $> 76$  (Constantino, 2012). For the continuous approach, language scores were checked for multicollinearity using variance inflation factors (VIF). As  $VIF \geq 5$ , CELF-5 core language scores, which had the highest correlations with other language measures, were used. To facilitate interpretation, CELF-5 core language scores and NVIQ were centered on  $M = 100$ , and SRS-2 total  $t$ -scores were centered on the sub-clinical threshold of 59. Educational enrollment was coded as enrolled or not, as secondary and post-secondary distributions were similar and as Mann-Whitney U tests revealed nonsignificant

differences in median counts for services received,  $U = 158$ ,  $z = -.12$ ,  $p = .916$ ; unmet needs,  $U = 178$ ,  $z = .49$ ,  $p = .642$ ; and barriers,  $U = 123.5$ ,  $z = -1.18$ ,  $p = .245$ .

## Analysis

To address the first research question, descriptive analysis was used to obtain primary outcome measures ( $M$ ,  $SD$ , range) for total number of services received, unmet service needs, and barriers to having service needs met, as well as percentage for each individual service, unmet service need, and barrier. For the second question, primary outcome measures were rate ratios and secondary outcomes were effect sizes. Analyses used an *a priori* significance level of .05. Given sample size, correlations identified significant effects to use in analysis. As data were non-normally distributed, Spearman (1904) correlations were used. Next, negative binomial regressions with a log link function and robust variance estimator separately estimated the extent to which number of services received, unmet service needs, and barriers to services were predicted from categorical individual differences (language impairment, intellectual disability, high level of autism traits) and social-ecological variables (sense of community, educational enrollment; Coxe et al., 2009). Regression analyses were repeated with continuous individual differences (centered CELF-5 core language scores, SRS-2 total  $t$ -scores, NVIQ). Model results were checked for linearity, normality, homogeneity of variance, and equal variance.

## Results

### Participant Flow

Participants were 73 autistic individuals; see Table 1. Caregivers ( $N = 52$ ) included primarily mothers ( $n = 47$ ), as well as grandparents ( $n = 2$ ), fathers ( $n = 2$ ), and a sibling ( $n = 1$ ). The female-to-male ratio for sex assigned at birth and gender was approximately 1:2. Over half were enrolled in educational programming, 28 of whom were in secondary education. Most

participants (54.79%) had language impairment; see Table 2. Six (8.22%) had NVIQ < 70, and 15 (20.55%) had NVIQ of 70 to 84. Levels of autism traits varied: high ( $n = 33$ , or 45.21%), moderate ( $n = 19$ , or 26.03%), low ( $n = 10$ , or 13.70%), and subclinical ( $n = 11$ , or 15.1%).

### **Patterns in Services Received, Unmet Service Needs, and Barriers to Services**

On average, participants received more than three services ( $M = 3.67$ ,  $SD = 2.76$ ), with a range from 0 to 12; see Figure 1. Nearly all received at least one service (93.15%), over three-quarters received at least two services (76.71%), and more than one-half received at least three services (58.90%). Only psychological or mental health services (65.75%) and disability-related medical services (54.79%) were received at above-chance rates (i.e., 50%), while approximately one-third received speech-language or communication services (34.25%); see Table 3.

Participants reported over three unmet service needs ( $M = 3.32$ ,  $SD = 3.20$ ), ranging from 0 to 14. Over three-quarters reported at least one unmet service need (78.08%), and over two-thirds reported at least two service needs (67.12%). Of those not receiving a given service, the most common unmet service needs pertained to entering adulthood: career counseling or job skills training (64.71%) and occupational or life skills therapy or training (50%). The next highest unmet service need pertained to more global access, speech-language services and communication services (45.83%). All other services were identified at well below-chance rates. Overall, even when receiving multiple services, participants had multiple unmet service needs.

In parallel to having multiple unmet service needs, participants reported multiple barriers to having service needs met ( $M = 5.52$ ,  $SD = 3.31$ , range = 0-11); see Table 4. Most of the 12 possible barriers were selected at above-chance rates and pertained to access versus quality: location (68.49%), services not available (67.12%), insurance not accepted (58.90%), ineligible (56.16%), cost (54.79%), getting information about services (54.79%), and scheduling conflicts



(50.68%). Nearly all participants reported at least one barrier (87.67%), over three-quarters reported at least three barriers (78.08%), and over half reported at least six barriers (52.05%). In all, participants received multiple services, unmet needs, and barriers.

### **Predictors of Services Received, Unmet Needs, and Barriers**

#### ***Categorical Approach to Individual Differences***

Spearman correlations revealed no significant relationships between services received, unmet needs, and barriers; see Table 5. Thus, receiving more services was not necessarily tied to fewer unmet needs or barriers. There were small to moderate effects of individual difference and social-ecological variables on each services outcome. Receiving more services was associated with having language impairment, having intellectual disability, and being enrolled in education. Descriptively, effect sizes of language impairment and educational enrollment were nearly twice that of intellectual disability. High levels of autism traits and lower sense of community were associated with more unmet service needs, and to a lesser extent, more barriers. There were few patterns among predictors. Having language impairment was associated with having intellectual disability, and lower sense of community was associated with high levels of autism traits.

Separate negative binomial regression models significantly predicted the number of services received and unmet service needs but not barriers; see Table 6. In the first model, for an individual without intellectual disability, without language impairment, and not in educational programming, the number of services received was 1.97. Holding all other variables constant, the number of services received was 1.70 times greater if an individual had language impairment than not (4.42 versus 2.60 services) and 1.56 times greater if in educational programming versus not (4.24 versus 2.71 services). The effect of intellectual disability was not significant. Next, analysis examined unmet service needs. The number of unmet service needs was 5.52 for an

individual without high levels of autism traits and a sense of community score of 3.06, which roughly corresponds with neither agree nor disagree. Accounting for all variables, the number of unmet needs in individuals with high levels of autism traits was 1.82 times greater than those without (i.e., lower than) high levels of autism traits (4.29 versus 2.36 needs). In sum, receiving more services was tied to language impairment and educational enrollment, while unmet service needs only involved high levels of autism traits.

### *Continuous Approach to Individual Differences*

When using continuous measures of overall language, NVIQ, and autism traits, effects somewhat differed from the categorical approach; see Table 7. Services variables did not necessarily correspond with one another, but there was a significant, moderate positive association between barriers to services and unmet service needs. As in the categorical approach, there were small to moderate effects of language, NVIQ, and educational enrollment on services received. Lower language scores, lower NVIQ, and being in educational programming significantly associated with receiving more services, but the effect size of NVIQ was 1.75 times larger than that of intellectual disability ( $\rho = -.42$  versus  $\rho = .24$ ). Effects of SRS-total  $t$ -scores and sense of community on number of unmet service needs and barriers were similar to the categorical approach. Higher SRS-2 total  $t$ -scores associated with more unmet needs and barriers, and sense of community showed the opposite pattern. Other differences pertained to predictor variables. Lower sense of community associated with higher SRS-2 total  $t$ -scores, and higher CELF-5 core language scores associated with NVIQ. However, the effect size of NVIQ with CELF-5 scores was over two times larger than that of intellectual disability ( $\rho = .59$  versus  $\rho = .27$ ). Last, higher CELF-5 core language scores were associated with not being in educational programming. In all, patterns varied when using a continuous approach to individual differences:

1) significant associations between unmet needs and barriers, as well as CELF-5 core language scores and educational enrollment, and 2) stronger associations between NVIQ than intellectual disability and CELF-5 core language scores, as well as educational enrollment status.

As in the categorical approach, separate negative binomial regression models were statistically significant for number of services received and unmet service needs but not barriers; see Table 8. However, effects differed. Number of services received was predicted by educational programming, but not CELF-5 core language scores or NVIQ. For a participant with NVIQ of 100, CELF-5 core language score of 100, and not in educational programming, the average expected number of services received was 2.11. Holding all other variables constant, the number of services received was 1.48 times greater if in educational programming versus not (4.07 versus 2.75 services); in comparison, the rate ratio was 1.56 in the categorical approach. Turning to unmet service needs, for an individual with a sense of community score of 3.06 (roughly indicating neither agree nor disagree) and an SRS total *t*-score of 59 (corresponding to the sub-clinical threshold for autism traits), the expected number of unmet service needs was 4.50. When accounting for all other variables, the number of unmet needs was 1.03 times greater for every one-unit increase in SRS-2 total *t*-scores above 59; in contrast, the rate ratio of high level of autism traits was 1.82. In all, receiving more services was tied only to educational enrollment, while unmet service needs appeared to be tied to SRS-2 total *t*-scores.

### **Summary**

Participants received over three services yet reported over three unmet service needs and five barriers. Effects showed nuanced differences when characterizing individual differences as categorical or continuous, and some correlational effects became nonsignificant in regression. In particular, language impairment, but not language scores, predicted services received.

## Discussion

In evaluating services access in minoritized autistic adolescents and adults varying in language skills, this study implemented a community-based participatory approach tailored to the intersection of race and disability. Team members agreed upon norms and a framework for diversity and services (Annamma et al., 2013; Plaut, 2010). This approach informs interpretation.

### Clinical Implications

This study was based on the premise that representation in research is crucial for evidence-based practice (Office of Management and Budget, 2024; Sackett et al., 1996). Here, the number of services received and unmet needs ( $n = 3.34$  and  $n = 3.32$ , respectively) were somewhat similar to high school seniors ( $n = 3.05$  and  $n = 1.85$ ) (Taylor & Henninger, 2015) but lower than adolescents and adults ( $n = 6.13$  and  $n = 3.18$ ) (Ishler et al., 2023; Ishler et al., 2022). Differences could be due to sampling, such as educational enrollment, co-occurring intellectual disability (<10% in this study versus 27%), or other diagnoses (language skills in this study versus psychiatric disorders in Ishler et al. (2022)). It may also be that this sample had different experiences in nuanced ways. Participants were approximately two-thirds to over two times less likely to receive transportation or social work services (Ishler et al., 2023); three to eight times more likely to identify speech-language, transportation, and personal assistant or aide services as unmet service needs (Taylor & Henninger, 2015); and more likely to endorse each individual barrier to services except for language (Koffer Miller et al., 2022; Newman et al., 2011; Taylor & Henninger, 2015). These nuances motivate attention to the literature versus making assumptions.

Understanding clinically significant differences in services is important for practice. Effects on services differed when using categorical labels versus continuous scores to characterize individual differences. While primary disability labels often use cutoffs (ESSA,

2015; IDEIA of 2004, 2018), continuous measures yielded an association between overall language scores and educational enrollment that was not significant in the categorical approach and a stronger association between language scores and NVIQ. These patterns raise the question of clinical significance. For instance, Johnson et al. (1999) found a research definition of language impairment in autistic and nonautistic adults yielded a higher estimate than clinical judgment (11.7% versus 5.5%). Here, >55% of participants qualified for language impairment, which predicted the number of services received. The proportion receiving speech-language services (>33.3%) or having unmet needs (30.14%) surpassed those with language impairment. It is unknown to what extent the cutoff used here – or domains of language assessed – align with clinical judgment or if services were tied to other areas of language, such as pragmatics (Schaeffer et al., 2023). For clinicians, this motivates assessing all areas where autistic individuals may experience differences and want support (Musgrove, 2015).

### **Implications for Autistic Individuals**

Findings also have implications for autistic individuals themselves. Models for barriers to having services needs met were not significant. However, associations between barriers and autism traits and sense of community point to the relevance of understanding disability *within* minoritized autistic individuals. Higher autism traits and lower sense of community were each associated with more barriers, as well as with one another. Per DisCrit (Annamma et al., 2013), these patterns might be explained by a model in which barriers to services, sense of community, and autism traits reinforce one another. Minoritized autistic individuals and their families face systemic barriers to accessing services (Weitlauf et al., 2024), including inadequate cultural responsiveness in service delivery that can exacerbate lack of trust and rapport with professionals (Pham & Charles, 2023). Consequently, these interactions might have a dual effect of both

failing to provide access to services to support individuals in areas where they may want support and negatively impacting sense of community. Amid a broader knowledge gap on sociocultural variation in autism traits (Golson et al., 2022), understanding how to reduce barriers through representative research and integration of individual preferences is key.

This study also leveraged a participatory approach that integrated components of the evidence base with partnership. To foster power-sharing (Wallerstein et al., 2019), this study took the same approach to diversity and representation as in recruitment of participants: attending to heterogeneity in social processes relevant to this study versus checking a box (Plaut, 2010). This approach provided a pathway to partnering with community members who are systematically excluded from the evidence base as both researchers and participants (Burns et al., 2011). The team considers these partnerships as the natural next step to advancing evidence-based practice (Sackett et al., 1996), inclusive of clinical services and research.

### **Limitations**

Though this study provided new information on services in minoritized autistic adolescents and adults varying in language skills, it had several limitations. First, this study did not examine socioeconomic status, which is associated with disparities in the transition to adulthood in autistic adolescents and adults (Eilenberg et al., 2019). However, socioeconomic status is a complex construct (Girolamo et al., 2023a). For instance, some measures use marital status, retirement or employment status, educational attainment, and occupational prestige (Hollingshead, 1975), but that does not account for cost of living or individual need. In turn, family financial burden may not apply to an adult who does not have living family members (Ishler et al., 2023). A second limitation was not reporting detailed information on participants, including exact multiracial categories, educational programming and “other” services received,

and frequency, extent of need, and duration of services (Burke et al., 2023). Amid concerns about potentially making participants re-identifiable in this small sample study (O'Keefe & Rubin, 2015), this report opted to provide less information. A third limitation is a need for better services measures that attend to nuances in services (Burke et al., 2023), given qualitative patterns that provide rich information (Anderson et al., 2018), balancing precision with privacy and feasibility for routine care settings (Douglas et al., 2022).

### **Future Directions**

Findings and limitations chart pathways forward to better understand services in the transition to adulthood in minoritized autistic adolescents and adults. First, heterogeneity within a 100% minoritized sample in the presence and nature of services justified use of DisCrit and Diversity Science (Annamma et al., 2013; Plaut, 2010). What is unknown, however, is how these theories inform larger-scale modeling of the transition to adulthood. Prior work has examined broad patterns in large datasets (Song et al., 2022; Turcotte et al., 2016) and longitudinal change in individual studies (Laxman et al., 2019), but future work is needed to merge theory-founded approaches to social processes and heterogeneity with statistical methods. A second area for future research is improved measures for not just services (Burke et al., 2023), but also for social drivers of health (Centers for Disease Control and Prevention, 2021). Here, sense of community was associated with services outcomes, but its clinical significance is unknown. This charge might be addressed through implementation science approaches (Waltz et al., 2019), using a purposeful process to engage multi-level partners and move knowledge into action (Field et al., 2014). Though not comprehensive, these directions for research serve to advance knowledge and advocacy for access to services for minoritized autistic adolescents and adults.

### **Conclusion**

In studying services access, unmet needs, and barriers in minoritized autistic adolescents and adults, this community-based participatory study began with lived experiences as expert opinion to guide investigation. Using theory-driven approaches to investigation, findings showed heterogeneity in the presence and nature of services. Correlates of services differed when using continuous or categorical approaches to individual differences, including language, further supporting the relevance of heterogeneity in characterizing the transition to adulthood. This approach and findings may support iterative development of evidence-based practice.

### Acknowledgements

We thank participants, families and community partners. This work was supported by the American Speech-Language-Hearing Foundation (PI: Girolamo).

### References

- American Psychiatric Association. (2013). *Diagnostic and statistical manual of mental disorders: DSM-5* (5th ed.). American Psychiatric Association.
- American Psychological Association. (2019). *Publication manual of the American Psychological Association: 7th Ed.* (7th ed.). Author.
- Anderson, C., Lupfer, A., & Shattuck, P. T. (2018). Barriers to receipt of services for young adults with autism. *Pediatrics*, *141*(Supplement\_4), S300-S305. <https://doi.org/10.1542/peds.2016-4300G>
- Annamma, S. A. (2018). *The pedagogy of pathologization: Dis/abled girls of color in the school-prison nexus*. Routledge.
- Annamma, S. A., Connor, D., & Ferri, B. (2013). Dis/ability critical race studies (DisCrit): Theorizing at the intersections of race and dis/ability. *Race Ethnicity and Education*, *16*(1), 1-31. <https://doi.org/10.1080/13613324.2012.730511>
- Autism. (2024). *Submission guidelines*. Retrieved May 18 from <https://journals.sagepub.com/author-instructions/aut>
- Botting, N. (2020). Language, literacy and cognitive skills of young adults with developmental language disorder (DLD). *International Journal of Language & Communication Disorders*, *55*(2), 255-265. <https://doi.org/10.1111/1460-6984.12518>
- Boucher, J. (2012). Research review: structural language in autistic spectrum disorder – characteristics and causes. *Journal of Child Psychology and Psychiatry*, *53*(3), 219-233.
- Bronfenbrenner, U. (1977). Toward an experimental ecology of human development. *American Psychologist*, *32*(7), 513-531. <https://doi.org/10.1037/0003-066X.32.7.513>
- Burke, M. M., Cheung, W. C., Best, M., DaWalt, L. S., & Taylor, J. L. (2023). Measuring what matters: Considerations for the measurement of services for individuals with autism. *Journal*



- of Developmental and Physical Disabilities*, 1-17. <https://doi.org/10.1007/s10882-023-09916-6>
- Burke, M. M., & Heller, T. (2017). Disparities in unmet service needs among adults with intellectual and other developmental disabilities. *Journal of Applied Research in Intellectual Disabilities*, 30(5), 898-910. <https://doi.org/10.1111/jar.12282>
- Burns, P. B., Rohrich, R. J., & Chung, K. C. (2011). The levels of evidence and their role in evidence-based medicine. *Plastic and Reconstructive Surgery*, 128(1), 305-310. <https://doi.org/10.1097/PRS.0b013e318219c171>
- Cameron, L. A., Borland, R. L., Tonge, B. J., & Gray, K. M. (2022). Community participation in adults with autism: A systematic review. *Journal of Applied Research in Intellectual Disabilities*, 35(2), 421-447. <https://doi.org/10.1111/jar.12970>
- Cardenas, I., Steiner, J. J., & Peterson, N. A. (2021). Measurement invariance of the Brief Sense of Community Scale across non - Hispanic, Black and Hispanic college students. *Journal of Community Psychology*, 49(6), 2106-2121. <https://doi.org/10.1002/jcop.22640>
- Centers for Disease Control and Prevention. (2021). *Social determinants of health: Know what affects health*. Retrieved March 5, from <https://www.cdc.gov/socialdeterminants/index.htm>
- Clegg, J., Crawford, E., Spencer, S., & Matthews, D. (2021). Developmental Language Disorder (DLD) in young people leaving care in England: A study profiling the language, literacy and communication abilities of young people transitioning from care to independence. *International Journal of Environmental Research and Public Health*, 18(8), 4107. <https://doi.org/10.3390/ijerph18084107>
- Constantino, J. N. (2012). *Social Responsiveness Scale, Second Edition*. W. P. Services.
- Coxe, S., West, S. G., & Aiken, L. S. (2009). The analysis of count data: A gentle introduction to Poisson regression and its alternatives. *Journal of Personality Assessment*, 91(2), 121-136. <https://doi.org/10.1080/00223890802634175>
- Crenshaw, K. (1989). Demarginalising the intersection of race and sex: A black feminist critique of antidiscrimination doctrine, feminist theory and antiracist politics. *University of Chicago Legal Forum*, 140, 25-42. <https://doi.org/10.4324/9781315582924-10>
- Douglas, N. F., Feuerstein, J. L., Oshita, J. Y., Schliep, M. E., & Danowski, M. L. (2022). Implementation science research in communication sciences and disorders: A scoping review. *American Journal of Speech-Language Pathology*, 31(3), 1054-1083. [https://doi.org/10.1044/2021\\_AJSLP-21-00126](https://doi.org/10.1044/2021_AJSLP-21-00126)
- Dunn, D. M. (2019). *Peabody Picture Vocabulary Test, Fifth Edition: Manual*. Pearson.
- Durkin, M. S., Maenner, M. J., Baio, J., Christensen, D., Daniels, J., Fitzgerald, R., Imm, P., Lee, L.-C., Schieve, L. A., Braun, K. V. N., Wingate, M. S., & Yeargin-Allsopp, M. (2017). Autism spectrum disorder among US children (2002–2010): Socioeconomic, racial, and ethnic disparities. *American Journal of Public Health*, 107(11), 1818-1826. <https://doi.org/10.2105/ajph.2017.304032>
- Eilenberg, J. S., Paff, M., Harrison, A. J., & Long, K. A. (2019). Disparities based on race, ethnicity, and socioeconomic status over the transition to adulthood among adolescents and young adults on the autism spectrum: A systematic review. *Current Psychiatry Reports*, 21(5), 32. <https://doi.org/10.1007/s11920-019-1016-1>
- Every Student Succeeds Act, Pub. L. No. 114-95, § 1001-1605 (2015).
- Fidler, L. J., Plante, E., & Vance, R. (2011). Identification of adults with developmental language impairments. *American Journal of Speech-Language Pathology*, 20(1), 2-13. [https://doi.org/10.1044/1058-0360\(2010/09-0096\)](https://doi.org/10.1044/1058-0360(2010/09-0096))

- Field, B., Booth, A., Ilott, I., & Gerrish, K. (2014). Using the Knowledge to Action Framework in practice: A citation analysis and systematic review. *Implementation Science*, 9(1), 172. <https://doi.org/10.1186/s13012-014-0172-2>
- Flanagin, A., Frey, T., Christiansen, S. L., & Committee, A. M. o. S. (2021). Updated guidance on the reporting of race and ethnicity in medical and science journals. *Jama*, 326(7), 621-627. <https://doi.org/10.1001/jama.2021.13304>
- Fletcher-Watson, S., Adams, J., Brook, K., Charman, T., Crane, L., Cusack, J., Leekam, S., Milton, D., Parr, J. R., & Pellicano, E. (2019). Making the future together: Shaping autism research through meaningful participation. *Autism*, 23(4), 943-953. <https://doi.org/10.1177/1362361318786721>
- Girolamo, T., Birmingham, M., Patel, K., Ghali, S., Campos, I., Greene-Pendelton, K., Canale, R., Larson, C., Sterling, A., & Shogren, K. A. (under review). Self-determination in minoritized autistic adolescents and adults. *Autism*. <https://doi.org/10.1101/2024.05.02.24306799>
- Girolamo, T., & Rice, M. L. (2022). Language impairment in autistic young adults. *Journal of Speech, Language, and Hearing Research*. [https://doi.org/10.1044/2022\\_JSLHR-21-00517](https://doi.org/10.1044/2022_JSLHR-21-00517)
- Girolamo, T., Shen, L., Gulick, A. M., Rice, M. L., & Eigsti, I. M. (2023a). Studies pertaining to language impairment in school-age autistic individuals underreport participant sociodemographics: A systematic review. *Autism*, 27(8), 2218-2240. <https://doi.org/10.1177/13623613231166749>
- Girolamo, T., Shen, L., Gulrick, A. M., Rice, M. L., & Eigsti, I.-M. (2023b). Studies assessing domains pertaining to structural language in autism vary in reporting practices and approaches to assessment: A systematic review. *Autism*. <https://doi.org/10.1177/13623613231216155>
- Golson, M. E., Ficklin, E., Haverkamp, C. R., McClain, M. B., & Harris, B. (2022). Cultural differences in social communication and interaction: A gap in autism research. *Autism Research*, 15(2), 208-214. <https://doi.org/10.1002/aur.2657>
- Grondhuis, S. N., Lecavalier, L., Arnold, L. E., Handen, B. L., Scahill, L., McDougle, C. J., & Aman, M. G. (2018). Differences in verbal and nonverbal IQ test scores in children with autism spectrum disorder. *Research in Autism Spectrum Disorders*, 49, 47-55. <https://doi.org/10.1016/j.rasd.2018.02.001>
- Halladay, A. K., Bishop, S., Constantino, J. N., Daniels, A. M., Koenig, K., Palmer, K., Messinger, D., Pelphrey, K., Sanders, S. J., Singer, A. T., Taylor, J. L., & Szatmari, P. (2015). Sex and gender differences in autism spectrum disorder: summarizing evidence gaps and identifying emerging areas of priority. *Molecular Autism*, 6(1), 36. <https://doi.org/10.1186/s13229-015-0019-y>
- Hollingshead, A. B. (1975). Four Factor Index of social status. In [Unpublished manuscript].
- Howlin, P., & Magiati, I. (2017). Autism spectrum disorder: Outcomes in adulthood. *Current Opinion in Psychiatry*, 30(2), 69-76. <https://doi.org/10.1097/ycp.0000000000000308>
- IBM Corp. (2023). *IBM SPSS Statistics for Macintosh*. In (Version 29.0.2.0) IBM Corp.
- Individuals with Disabilities Education Improvement Act of 2004, 20 U.S.C. § 1400 et seq. (2018).
- Ishler, K. J., Berg, K. A., Olgac, T., Obeid, R., & Biegel, D. E. (2023). Barriers to service and unmet need among autistic adolescents and young adults. *Autism*, 27(7), 1997-2010. <https://doi.org/10.1177/13623613221150569>
- Ishler, K. J., Biegel, D. E., Wang, F., Olgac, T., Lytle, S., Miner, S., Edguer, M., & Kaplan, R. (2022). Service use among transition-age youth with autism spectrum disorder. *Journal of*

- Autism and Developmental Disorders*, 52(3), 1051-1065. <https://doi.org/10.1007/s10803-021-04999-6>
- Johnson, C. J., Beitchman, J. H., & Brownlie, E. (2010). Twenty-year follow-up of children with and without speech-language impairments: Family, educational, occupational, and quality of life outcomes. *American Journal of Speech-Language Pathology*, 19(1), 51-65. [https://doi.org/10.1044/1058-0360\(2009/08-0083\)](https://doi.org/10.1044/1058-0360(2009/08-0083))
- Johnson, C. J., Beitchman, J. H., Young, A., Escobar, M., Atkinson, L., Wilson, B., Brownlie, E. B., Douglas, L., Taback, N., & Lam, I. (1999). Fourteen-year follow-up of children with and without speech/language impairments: Speech/language stability and outcomes. *Journal of Speech, Language, and Hearing Research*, 42(3), 744-760. <https://doi.org/10.1044/jslhr.4203.744>
- Koffer Miller, K. H., Cooper, D. S., Song, W., & Shea, L. L. (2022). Self-reported service needs and barriers reported by autistic adults: Differences by gender identity. *Research in Autism Spectrum Disorders*, 92, 101916. <https://doi.org/10.1016/j.rasd.2022.101916>
- Kover, S. T., & Abbeduto, L. (2023). Toward equity in research on intellectual and developmental disabilities. *American Journal on Intellectual and Developmental Disabilities*, 128(5), 350-370. <https://doi.org/10.1352/1944-7558-128.5.350>
- Lardier Jr, D. T., Opara, I., Cantu, I., Garcia - Reid, P., & Reid, R. J. (2022). The brief sense of community scale: Testing dimensionality and measurement invariance by gender among Hispanic/Latinx youth. *Journal of Community Psychology*, 50(1), 409-425. <https://doi.org/10.1002/jcop.22585>
- Lardier Jr, D. T., Reid, R. J., & Garcia - Reid, P. (2018). Validation of the Brief Sense of Community Scale among youth of color from an underserved urban community. *Journal of Community Psychology*, 46(8), 1062-1074. <https://doi.org/10.1002/jcop.22091>
- Laxman, D. J., Taylor, J. L., DaWalt, L. S., Greenberg, J. S., & Mailick, M. R. (2019). Loss in services precedes high school exit for teens with autism spectrum disorder: A longitudinal study. *Autism Research*, 12(6), 911-921. <https://doi.org/10.1002/aur.2113>
- Little, R. J., & Rubin, D. B. (2019). *Statistical analysis with missing data* (Vol. 793). John Wiley & Sons.
- Liu, B. M., Paskov, K., Kent, J., McNealis, M., Sutaria, S., Dods, O., Harjadi, C., Stockham, N., Ostrovsky, A., & Wall, D. P. (2023). Racial and ethnic disparities in geographic access to autism resources across the US. *JAMA Network Open*, 6(1), e2251182. <https://doi.org/10.1001/jamanetworkopen.2022.51182>
- Maenner, M. J., Warren, Z., Williams, A. R., Amoakohene, E., Bakian, A. V., Bilder, D. A., Durkin, M. S., Fitzgerald, R. T., Furnier, S. M., Hughes, M. M., Ladd-Acosta, C. M., McArthur, D., Pas, E. T., Salinas, A., Vehorn, A., Williams, S., Esler, A., Grzybowski, A., Hall-Lande, J., . . . Shaw, K. A. (2023). Prevalence and characteristics of autism spectrum disorder among children aged 8 years — Autism and Developmental Disabilities Monitoring Network, 11 Sites, United States, 2020. *MMWR Surveillance Summaries*, 72, 1-14. <https://doi.org/10.15585/mmwr.ss7202a1>
- Magiati, I., Tay, X. W., & Howlin, P. (2014). Cognitive, language, social and behavioural outcomes in adults with autism spectrum disorders: A systematic review of longitudinal follow-up studies in adulthood. *Clinical Psychology Review*, 34(1), 73-86. <https://doi.org/10.1016/j.cpr.2013.11.002>
- Mandell, D. S., Ittenbach, R. F., Levy, S. E., & Pinto-Martin, J. A. (2007). Disparities in diagnoses received prior to a diagnosis of autism spectrum disorder. *Journal of Autism and*

- Developmental Disorders*, 37, 1795-1802. <https://doi.org/10.1007/s10803-006-0314-8>
- Mandell, D. S., Listerud, J., Levy, S. E., & Pinto-Martin, J. A. (2002). Race differences in the age at diagnosis among Medicaid-eligible children with autism. *Journal of the American Academy of Child & Adolescent Psychiatry*, 41(12), 1447-1453. <https://doi.org/10.1097/00004583-200212000-00016>
- Maye, M., Boyd, B. A., Martínez-Pedraza, F., Halladay, A., Thurm, A., & Mandell, D. S. (2021). Biases, barriers, and possible solutions: Steps towards addressing autism researchers under-engagement with racially, ethnically, and socioeconomically diverse communities. *Journal of Autism and Developmental Disorders*, 1-6. <https://doi.org/10.1007/s10803-021-05250-y>
- Musgrove, M. (2015). *Speech and language services for students with autism spectrum disorder - Individuals with Disability Education Act*. Office of Special Education Programs. Retrieved May 24 from <https://sites.ed.gov/idea/idea-files/osep-dear-colleague-letter-on-speech-and-language-services-for-students-with-autism-spectrum-disorder/>
- National Institute on Deafness and Other Communication Disorders. (2022). *2023-2027 NIDCD Strategic Plan*. National Institutes of Health.
- National Institutes of Health. (2021). *NIH-wide strategic plan for fiscal years 2021-2025*. <https://www.nih.gov/sites/default/files/about-nih/strategic-plan-fy2021-2025-508.pdf>
- Newman, L., Wagner, M., Huang, T., Shaver, D., Knokey, A.-M., Yu, J., Contreras, E., Ferguson, K., Greene, S., Nagle, K., & Cameto, R. (2011). *Secondary school programs and performance of students with disabilities: A special topic report of findings from the National Longitudinal Transition Study-2 (NLTS2)* (NCSE 2012-3000).
- O'Keefe, C. M., & Rubin, D. B. (2015). Individual privacy versus public good: protecting confidentiality in health research. *Statistics in Medicine*, 34(23), 3081-3103. <https://doi.org/10.1002/sim.6543>
- Office of Management and Budget. (2024). *Revisions to OMB's Statistical Policy Directive No. 15: Standards for Maintaining, Collecting, and Presenting Federal Data on Race and Ethnicity*,. (89 FR 22182). Federal Register Notice: Office of Information and Regulatory Affairs, Office of Management and Budget, Executive Office of the President, Retrieved from [https://obamawhitehouse.archives.gov/omb/fedreg\\_1997standards](https://obamawhitehouse.archives.gov/omb/fedreg_1997standards)
- Opara, I., Lardier, D. T., Garcia-Reid, P., & Reid, R. J. (2021). Testing the factor structure of the brief sense of community scale among black girls and the relationship with ethnic identity, empowerment and social support. *Children and Youth Services Review*, 127, 106095. <https://doi.org/10.1016/j.childyouth.2021.106095>
- Oswald, F. (2024). Positionality statements should not force us to 'out' ourselves. *Nature Human Behaviour*, 1-1. <https://doi.org/10.1038/s41562-023-01812-5>
- Peterson, N. A., Speer, P. W., & McMillan, D. W. (2008). Validation of a brief sense of community scale: Confirmation of the principal theory of sense of community. *Journal of Community Psychology*, 36(1), 61-73. <https://doi.org/10.1002/jcop.20217>
- Pham, A. V., & Charles, L. C. (2023). Racial disparities in autism diagnosis, assessment, and intervention among minoritized youth: Sociocultural issues, factors, and context. *Current Psychiatry Reports*, 25(5), 201-211. <https://doi.org/10.1007/s11920-023-01417-9>
- Plaut, V. C. (2010). Diversity science: Why and how difference makes a difference. *Psychological Inquiry*, 21(2), 77-99. <https://doi.org/10.1080/10478401003676501>
- Powell, J. A. (2012). *Racing to justice: Transforming our conceptions of self and other to build an inclusive society*. Indiana University Press.
- Rast, J. E., Fernandes, S. J., Schott, W., & Shea, L. L. (2023). Disparities by race and ethnicity in

- inpatient hospitalizations among autistic adults. *Journal of Autism and Developmental Disorders*. <https://doi.org/10.1007/s10803-023-05911-0>
- Raven, J., Rust, J., Chan, F., & Zhou, X. (2018). *Raven's 2 Progressive Matrices, Clinical Edition*. Pearson.
- Romualdez, A. M., Walker, Z., & Remington, A. (2021). Autistic adults' experiences of diagnostic disclosure in the workplace: Decision-making and factors associated with outcomes. *Autism & Developmental Language Impairments*, 6, 23969415211022955. <https://doi.org/10.1177/23969415211022955>
- Sackett, D. L., Rosenberg, W. M., Gray, J. M., Haynes, R. B., & Richardson, W. S. (1996). Evidence based medicine: What it is and what it isn't. In (Vol. 312, pp. 71-72): BMJ.
- Schaeffer, J., Abd El-Raziq, M., Castroviejo, E., Durrleman, S., Ferré, S., Grama, I., Hendriks, P., Kissine, M., Manenti, M., Marinis, T., Meir, N., Novogrodsky, R., Perovic, A., Panzeri, F., Silleresi, S., Sukenik, N., Vicente, A., Zebib, R., Prévost, P., & Tuller, L. (2023). Language in autism: Domains, profiles and co-occurring conditions. *Journal of Neural Transmission*, 130(3), 433-457. <https://doi.org/10.1007/s00702-023-02592-y>
- Schott, W., Tao, S., & Shea, L. (2022). Co - occurring conditions and racial - ethnic disparities: Medicaid enrolled adults on the autism spectrum. *Autism Research*, 15(1), 70-85. <https://doi.org/10.1002/aur.2644>
- Selin, C. M., Rice, M. L., Girolamo, T. M., & Wang, C. J. (2022). Work setting effects on speech-language pathology practice: Implications for Identification of children with specific language impairment. *American Journal of Speech-Language Pathology*, 31(2), 854-880. [https://doi.org/10.1044/2021\\_AJSLP-21-00024](https://doi.org/10.1044/2021_AJSLP-21-00024)
- Shattuck, P. T., Wagner, M., Narendorf, S., Sterzing, P., & Hensley, M. (2011). Post-high school service use among young adults with an autism spectrum disorder. *Archives of pediatrics & adolescent medicine*, 165(2), 141-146. <https://doi.org/10.1001/archpediatrics.2010.279>
- Shaw, K. A., McArthur, D., Hughes, M. M., Bakian, A. V., Lee, L.-C., Pettygrove, S., & Maenner, M. J. (2022). Progress and disparities in early identification of autism spectrum disorder: autism and developmental disabilities monitoring network, 2002-2016. *Journal of the American Academy of Child & Adolescent Psychiatry*, 61(7), 905-914. <https://doi.org/10.1016/j.jaac.2021.11.019>
- Shriberg, L. D., Lohmeier, H. L., Campbell, T. F., Dollaghan, C. A., Green, J. R., & Moore, C. A. (2009). A nonword repetition task for speakers with misarticulations: The Syllable Repetition Task (SRT). *Journal of Speech, Language & Hearing Research*, 52(5), 1189-1212. [https://doi.org/10.1044/1092-4388\(2009/08-0047\)](https://doi.org/10.1044/1092-4388(2009/08-0047))
- Smith, K. A., Gehricke, J.-G., Iadarola, S., Wolfe, A., & Kuhlthau, K. A. (2020). Disparities in service use among children with autism: A systematic review. *Pediatrics*, 145(Supplement\_1), S35-S46. <https://doi.org/10.1542/peds.2019-1895G>
- Song, W., Salzer, M. S., Nonnemacher, S. L., & Shea, L. (2022). Lifespan service receipt and unmet needs among individuals on the autism spectrum. *Administration and Policy in Mental Health and Mental Health Services Research*, 49(4), 694-705. <https://doi.org/10.1007/s10488-022-01192-4>
- Spearman, C. (1904). The proof and measurement of association between two things. *American Journal of Psychology*, 15(1), 72-101.
- Taylor, J. L., & Henninger, N. A. (2015). Frequency and correlates of service access among youth with autism transitioning to adulthood. *Journal of Autism and Developmental Disorders*, 45(1), 179-191. <https://doi.org/10.1007/s10803-014-2203-x>

- Thompson-Hodgetts, S., Labonte, C., Mazumder, R., & Phelan, S. (2020). Helpful or harmful? A scoping review of perceptions and outcomes of autism diagnostic disclosure to others. *Research in Autism Spectrum Disorders*, 77, 101598. <https://doi.org/10.1016/j.rasd.2020.101598>
- Tomblin, J. B., Records, N. L., Buckwalter, P., Zhang, X., Smith, E., & O'Brien, M. (1997). Prevalence of specific language impairment in kindergarten children. *Journal of Speech, Language, and Hearing Research*, 40(6), 1245-1260. <https://doi.org/10.1044/jslhr.4006.1245>
- Turcotte, P., Mathew, M., Shea, L. L., Brusilovskiy, E., & Nonnemacher, S. L. (2016). Service needs across the lifespan for individuals with autism. *Journal of autism and developmental disorders*, 46(7), 2480-2489. <https://doi.org/10.1007/s10803-016-2787-4>
- Turnbull III, H. R., & Turnbull, A. P. (1998). *Free appropriate public education: The law and children with disabilities*. Love Publishing Company.
- Wallerstein, N., & Duran, B. (2010). Community-based participatory research contributions to intervention research: the intersection of science and practice to improve health equity. *American Journal of Public Health*, 100(Supplement 1), S40-46. <https://doi.org/10.2105/ajph.2009.184036>
- Wallerstein, N., Muhammad, M., Sanchez-Youngman, S., Rodriguez Espinosa, P., Avila, M., Baker, E. A., Barnett, S., Belone, L., Golub, M., Lucero, J., Mahdi, I., Noyes, E., Nguyen, T., Roubideaux, Y., Sigo, R., & Duran, B. (2019). Power dynamics in community-based participatory research: A multiple-case study analysis of partnering contexts, histories, and practices. *Health Education & Behavior*, 46(Supplement 1), 19S-32S. <https://doi.org/10.1177/1090198119852998>
- Wallerstein, N. B., & Duran, B. (2006). Using community-based participatory research to address health disparities. *Health Promotion Practice*, 7(3), 312-323. <https://doi.org/10.1177/1524839906289376>
- Waltz, T. J., Powell, B. J., Fernández, M. E., Abadie, B., & Damschroder, L. J. (2019). Choosing implementation strategies to address contextual barriers: Diversity in recommendations and future directions. *Implementation Science*, 14, 1-15. <https://doi.org/10.1186/s13012-019-0892-4>
- Weitlauf, A. S., Miceli, A., Vehorn, A., Dada, Y., Pinnock, T., Harris, J. W., Hine, J., & Warren, Z. (2024). Screening, diagnosis, and intervention for autism: Experiences of Black and multiracial families seeking care. *Journal of Autism and Developmental Disorders*, 54(3), 931-942. <https://doi.org/10.1007/s10803-022-05861-z>
- Wiig, E. H., Semel, E., & Secord, W. (2013). *Clinical Evaluation of Language Fundamentals-5th Ed.*
- Williams, E.-D. G., Smith, M. J., & Boyd, B. (2023). Perspective: The role of diversity advisory boards in autism research. *Autism*, 27(3), 864-869. <https://doi.org/10.1177/13623613221133633>
- Williams, K. T. (2019). *Expressive Vocabulary Test-Third Edition: Manual*. Pearson.
- Wilton, L. S., Bell, A. N., Vahradyan, M., & Kaiser, C. R. (2020). Show don't tell: Diversity dishonesty harms racial/ethnic minorities at work. *Personality and Social Psychology Bulletin*, 46(8), 1171-1185. <https://doi.org/10.1177/0146167219897149>

### Figure Legend

Figure 1. Frequency ( $N = 73$ ) indicating the number of services received and unmet service needs

## Tables

Table 1. Participant Sociodemographics

Table 2. Participant Language, NVIQ, and Autism Traits

Table 3. Frequencies of Services Received and Unmet Service Needs (N = 73)

Table 4. Barriers to Having Service Needs Met (N = 73)

Table 5. Spearman's Correlations Coefficients of Services, Categorical Individual Differences, and Social-Ecological Factors

Table 6. Negative Binomial Regression Results of Numbers of Services, Unmet Needs, and Barriers to Having Service Needs Met Using a Categorical Approach to Individual Differences

Table 7. Spearman's Correlations Coefficients of Services, Continuous Individual Differences, and Social-Ecological Factors

Table 8. Negative Binomial Regression Results of Numbers of Services, Unmet Needs, and Barriers with Continuous Individual Difference Predictors

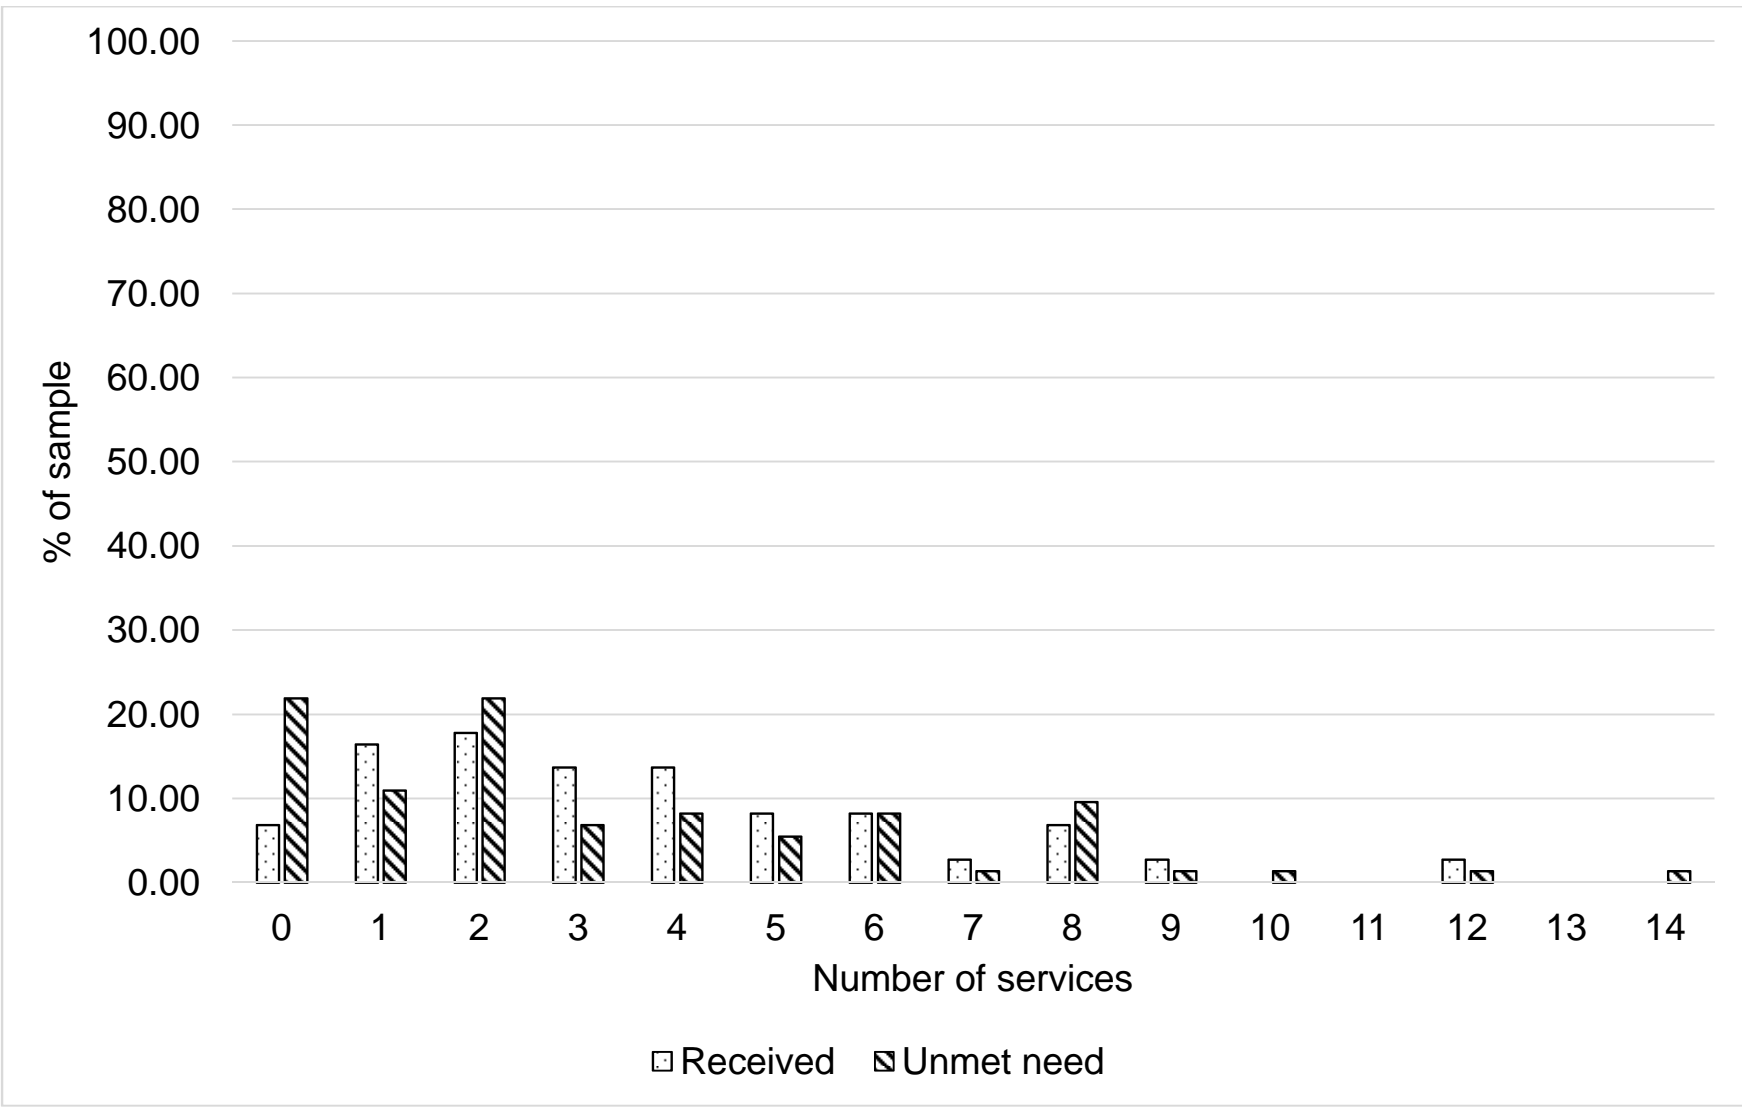

Source: https://medrxiv.org/content/medrxiv/early/2024/05/27/2024.05.26.24307944.full.pdf
