27 **Abstract**

28 **Background:** Racially and ethnically minoritized (minoritized) autistic individuals face  
29 intersectional disparities in services access in the transition to adulthood. Our understanding of  
30 disparities is limited by systematic exclusion from research and inadequate approaches to  
31 characterizing services. To address these gaps and effect advocacy, this study: 1) examined  
32 services received, unmet service needs, and barriers in minoritized autistic adolescents and adults,  
33 and 2) determined if language, NVIQ, and autism traits predict services when deployed as binary  
34 or continuous variables.

35 **Method:** Academic and community partners tailored CBPR to a local context. Participants ( $N =$   
36 73, ages 13-30) completed a behavioral assessment protocol. Participants and caregivers  
37 provided information on services received, unmet service needs, and barriers to services. Data  
38 were analyzed using descriptives and regression.

39 **Results:** Participants received multiple services yet had multiple unmet service needs and  
40 barriers. Effects of services differed by approach. Language impairment, but not language scores,  
41 predicted receiving more services. High levels of autism traits and autism trait scores predicted  
42 more unmet service needs.

43 **Implications:** While the number of services and unmet service needs were similar to prior work,  
44 differences in individual service variables and effects support attention to heterogeneity. Findings  
45 support intersectional approaches to CBPR and autism research.

46 **Keywords:** services, autism, transition to adulthood

47 **Learning outcomes:** After reading the article, the learner will be able to: 1) summarize  
48 knowledge gaps about access to services; 2) explain the relevance of tailoring CBPR to a local  
49 context; and 3) describe implications of findings for clinicians and autistic individuals.

50 **Services in Minoritized Autistic Adolescents and Adults Varying in Language Skills**

51 In the United States (U.S.), autism has a diagnosed prevalence that is higher in Black,  
52 Hispanic, and Asian and Pacific Islander youth than white youth (1 in 30-34 versus 1 in 42)  
53 (Maenner et al., 2023). While social communication is central to an autism diagnosis (American  
54 Psychiatric Association [APA], 2013; World Health Organization [WHO], 2022), over 50% of  
55 autistic individuals have structural language impairment (LI; Boucher, 2012), or challenges in  
56 phonology, morphology, and syntax (Schaeffer et al., 2023). Yet autistic individuals who are  
57 racially and ethnically minoritized (hereafter, minoritized) and those with LI face intersectional  
58 disparities in adult outcomes (Johnson et al., 2010; Schott et al., 2022) and systematic exclusion  
59 from research (Girolamo et al., 2023a). Systematic reviews on evidence-based autism  
60 intervention (Steinbrenner et al., 2022) and assessment of structural language in autism  
61 (Girolamo et al., 2023a) revealed 63.6% and 77% of participants (ages birth to 22 and 3 to 21),  
62 respectively, were white; 9.4% and 7.9% Hispanic or Latine; 7.7% and 6.2% Black; and 6.4%  
63 and 0.7% Asian or Pacific Islander (Steinbrenner et al., 2022). Currently, 58.4% of the U.S.  
64 population is white, 19.5% Hispanic or Latine, 13.7% Black, and 6.4% Asian, (United States  
65 Census Bureau, 2024). Thus, even with growing attention to services in the transition to  
66 adulthood ("Individuals with Disabilities Education Improvement Act [IDEIA] of 2004," 2018;  
67 Roux et al., 2015), a nonrepresentative evidence base limits the ability to reduce disparities  
68 (National Institutes of Health, 2021). With over 1.2 million autistic youth in entering adulthood  
69 in the next decade (Interagency Autism Coordinating Committee, 2023), a broad understanding  
70 of services in autistic individuals is crucial for health equity.

71 Though under-utilized in autism research (Chen et al., 2024), community-based  
72 participatory research (CBPR) is a proven way to reduce disparities (Wallerstein & Duran, 2017)

73 and aligns with evidence-based practice: integrating expert opinion, individual preference, and  
74 best-available evidence (Sackett et al., 1996). In using full partnership with shared power to  
75 generate knowledge for change (Wallerstein & Duran, 2006, 2010), CBPR is at the middle of a  
76 community-engaged research model continuum that ranges from lesser (e.g., communities  
77 inform, consult, participate in, or initiate research) to greater community engagement and power  
78 (e.g., communities lead and own research; Key et al., 2019). CBPR is guided by principles: a)  
79 recognize the community as a unit of identity; b) address complex contexts, such as cultural  
80 factors and historical mistrust; c) use a social-ecological approach, which attributes experiences  
81 of interactions between individuals and multi-level environmental influences (Bronfenbrenner,  
82 1977), from family (e.g., household income) and interpersonal (e.g., social networks) to  
83 institutional (e.g., participation in institutions, such as schools), community (e.g., availability of  
84 services), and societal (e.g., policy for service eligibility; Anderson et al., 2018b; National  
85 Institute on Minority Health and Health Disparities [NIMHD], 2017); d) acknowledge and build  
86 upon community strengths (Clinical and Translational Science Awards Consortium [CTSA],  
87 2011); e) foster equitable partnership in all research phases, given individual, relational, and  
88 structural power dynamics; f) balance knowledge generation with action to benefit all partners; g)  
89 disseminate findings with partners to the community; h) commit to sustained partnership to  
90 effect change; and i) engage in a reflective, cyclical process (Israel et al., 2003, 2010; Wallerstein  
91 et al., 2008). In all, CBPR is a holistic framework ideal for studying services for advocacy.

92 However, prior work reveals inadequate attention to intersectional nuance (Anderson et  
93 al., 2018b; Chen et al., 2024; Fletcher-Watson et al., 2019; Nicolaidis & Raymaker, 2015), which  
94 is critical in considering the experiences of transition-aged autistic individuals (Schendel et al.,  
95 2022). Theories from special education (Annamma et al., 2013), legal history (Crenshaw, 1989,

96 1991), and psychology (Plaut, 2010) frame race and disability as mutually reinforcing social  
97 constructs that cause social marginalization. That is, perceptions of others about race and  
98 disability versus minoritized autistic individuals themselves lead to racism and ableism  
99 (Annamma et al., 2016). For example, U.S. law enacted race- and disability-based segregation in  
100 education; later policy to desegregate schools involved changes in societal norms and not in  
101 students (Powell, 2012; Turnbull III & Turnbull, 1998). Persisting intersectional disparities in  
102 access to services similarly implicate social processes (Annamma, 2018; Annamma et al., 2013;  
103 Kasambira Fannin et al., 2024). Minoritized families of autistic youth report reduced access to  
104 services due to practitioners lacking knowledge about community norms (Onovbiona et al., 2023;  
105 Weitlauf et al., 2024), as well as greater autism-related stigma than white families (Rivera-  
106 Figueroa et al., 2022). At the same time, there is no one-to-one ratio between autism, race, and  
107 experience. While autistic adults report stigma from disclosure (Thompson-Hodgetts et al., 2020),  
108 Black autistic adults report racism that can intersect with ableism (Davis et al., 2024).  
109 Understanding heterogeneity in the experiences of minoritized individuals is important.

110 A broader question is how to apply CBPR to study services in minoritized autistic  
111 individuals. Suggested practices to enhance inclusion in autism research are diversity advisory  
112 boards (Williams et al., 2023) and community involvement statements (Autism, 2024). In  
113 requiring disclosure, each risks perpetuating inequity (Wallerstein et al., 2019). For instance, a  
114 journal may pressure a minoritized autistic author of a manuscript to disclose their diagnosis in  
115 order to “prove” inclusion (Oswald, 2024), without any guarantee of confidentiality or  
116 nondiscrimination. In turn, a white editorial board member who reviews the manuscript may  
117 violate journal policies and professional ethics by sharing private information about the author  
118 with a therapist network. If the journal fails to act upon learning of these violations, it amounts to

119 diversity dishonesty and violates CBPR principles (Wilton et al., 2020). Given these  
120 considerations, this report examines services in minoritized autistic adolescents and adults  
121 varying in language skills and shares use of CBPR.

### 122 **Services in Minoritized Autistic Adolescents and Adults**

123 The best-available evidence shows variability in services received, unmet service needs,  
124 and barriers to services in transition-aged autistic individuals. The National Longitudinal  
125 Transition Survey 2 (NLTS2) followed a nationally representative sample of >11,000 adolescents  
126 receiving special education services from 2000 to 2010 and assessed receipt of 16 services per  
127 special education legislation ("Individuals with Disabilities Education Act [IDEA] of 1997,"  
128 1997) and barriers to services (Levine et al., 2007); see Supplementary Table 1 for full list. In  
129 high school, 74.6% of NLTS2 youth (ages 13 to 18) received speech-language therapy, and other  
130 service utilization rates ranged from 2.5% for audiology to 54.6% for transportation (Levine et  
131 al., 2007). Nearly 40% of 410 NLTS2 youth (ages 19 to 23) received no services post-high  
132 school, and 9.1% received speech-language therapy (Shattuck et al., 2011). Subsequent studies  
133 referencing NLTS2 services had mixed findings; see Supplementary Tables 1 to 3. For example,  
134 98.2% of 168 autistic individuals (ages 16 to 30, 60% post-secondary) received at least one  
135 service, but the number of services received ( $M$ : 6.13, 0-15; Ishler et al., 2022) and unmet service  
136 needs ( $M$ : 3.18, 0-11) varied (Ishler et al., 2023); see also, Taylor and Henninger (2015).  
137 Interpreting this variability is challenging for several reasons.

138 First, studies examined racial disparities in services using methods that erased  
139 heterogeneity, despite broad patterns showing no one-to-one ratio between services and race  
140 (Eilenberg et al., 2019; Liu et al., 2023; Schott et al., 2021). Some studies found racial disparities  
141 in services received and unmet needs (Shattuck et al., 2011; Taylor & Henninger, 2015), while

142 others did not (Ishler et al., 2022, 2023). These findings are based on group comparisons of white  
143 and minoritized groups, with 77% to 93.6% white samples (Ishler et al., 2022, 2023; Laxman et  
144 al., 2019; Song et al., 2022; Taylor & Henninger, 2015; Turcotte et al., 2016). In some cases,  
145 analysis excluded Asian/Pacific Islander, Latino, Hispanic, or Chicano, and Native American  
146 participants (Turcotte et al., 2016), or “adjusted” for race (Song et al., 2022). These practices  
147 erase variance (Swilley-Martinez et al., 2023). Studies also used inconsistent definitions for  
148 “minoritized.” Reports on the same sample defined “underrepresented minority” as Black,  
149 Hispanic, or multiracial (Ishler et al., 2022) and “historically marginalized minority” as also  
150 including Native American or Alaska Native (Ishler et al., 2023). Understanding services patterns  
151 requires moving beyond white-minoritized comparisons.

152 A second limitation was characterizing language and cognitive skills with confounding  
153 approaches. Shattuck et al. (2011) found no effects of nonverbal status on services received but  
154 equated “nonverbal” with “severe LI,” or caregiver report of “has a lot of trouble speaking  
155 clearly” or “doesn’t speak at all.” This suggests spoken language entails linguistic knowledge. In  
156 reality, language profiles in autism vary by domain and definition (Bal et al., 2016; Butler et al.,  
157 2023; Girolamo et al., 2023b; Koegel et al., 2020). “Speaking clearly” could involve motor  
158 speech (Shriberg et al., 2019), lexical access (Arunachalam & Luyster, 2016), or morphosyntax  
159 (Sterling, 2018). To strengthen characterization of LI, assessment across domains is needed.  
160 Studies also examined intellectual disability (ID), finding no effects on services received, unmet  
161 needs, and barriers (Ishler et al., 2023; Ishler et al., 2022; Laxman et al., 2019; Taylor &  
162 Henninger, 2015) or positive effects on services received (Laxman et al., 2019). However,  
163 studies determined ID using measures that include language (Laxman et al., 2019; Sparrow et al.,  
164 1993; Sparrow et al., 2005) or require verbal language to complete tasks (Roid & Pomplun, 2003;

165 Taylor & Henninger, 2015). Language and IQ can dissociate in autism (Manenti et al., 2024;  
166 Silleresi et al., 2020), even when considering autism traits (Bal et al., 2016). Also, IQ measures  
167 requiring verbal language yield scores nearly 1 *SD* lower than NVIQ measures in autistic youth  
168 with communication age equivalents below 4.5 years (Grondhuis et al., 2018). While LI and ID  
169 are clinically relevant, a dimensional approach to characterizing language skills across domains  
170 and NVIQ is needed (Kover & Abbeduto, 2023).

171 Third, amid a broad knowledge gap on factors in outcomes of older autistic individuals  
172 (Schendel et al., 2022), studies overlooked interpersonal social-ecological factors. Some studies  
173 focused on high school enrollment, an institutional factor (Anderson et al., 2018b). High school  
174 exit was tied to receiving fewer services and greater unmet service needs (Laxman et al., 2019;  
175 Song et al., 2022; Turcotte et al., 2016). Elsewhere, high school enrollment predicted receiving  
176 more services but not barriers (Ishler et al., 2022, 2023). Amid calls to focus on the social  
177 consequences of race and disability in minoritized autistic individuals (Davis et al., 2024), a  
178 promising interpersonal factor is sense of community (Peterson et al., 2008). As a proxy for  
179 social capital, sense of community is linked to network-based resources (Carpiano & Hystad,  
180 2011; Michalski et al., 2020), as well as access to services in autistic youth (Gulsrud et al., 2021).  
181 In turn, barriers to services are linked to community access, which may limit sense of community  
182 (Cameron et al., 2022). While sense of community can be reliably and sensitively measured in  
183 Black and Hispanic adolescents (Lardier Jr et al., 2018, 2022; Opara et al., 2021) and adults from  
184 the general population (Cardenas et al., 2021), it has yet to be investigated in autism research.

### 185 **The Current Study**

186 Evidence to date points to the need for nuance in use of CBPR to study services in  
187 minoritized autistic individuals in the transition to adulthood. Given theories to frame race and



188 disability (Annamma et al., 2013; Crenshaw, 1989, 1991; Plaut, 2010) and approaches to  
189 characterize heterogeneity in autism (Kover & Abbeduto, 2023; Schaeffer et al., 2023), this study  
190 aimed to generate knowledge for advocacy. A focus was multi-level influences on services, using  
191 direct assessment to characterize language skills across domains and NVIQ. Last, use of CBPR  
192 aligns with evidence-based practice (Burns et al., 2011). This study asked:

- 193 1) What are patterns in services received, unmet service needs, and barriers to having  
194 service need met in minoritized autistic adolescents and adults?
- 195 2) To what extent are services received, unmet service needs, and barriers to services,  
196 predicted by individual language skills and NVIQ, educational enrollment, and sense of  
197 community, and how do effects compare when using a categorical versus continuous  
198 approach to language and NVIQ?

## 199 **Method**

200 This study received institutional board approval and followed all ethical guidelines.

### 201 **Participatory Approach**

202 This study began as discussions with 5 minoritized autistic adults, 3 caregivers, and  
203 practitioners (3 speech-language pathologists, 2 psychologists, 2 special education teachers)  
204 about disparities in research and practice based on their experiences. A research team member  
205 had met a self-advocate at an event for minoritized professionals, self-advocates, and families,  
206 connected over shared interests in intersectional approaches to evidence-based practice, and the  
207 self-advocate invited others to their discussions. The aim was to address community priorities,  
208 such as community-based assessment to provide access to services to minoritized autistic youth  
209 and adults who were being denied services. Over several years, these parties worked to provide  
210 community programming (e.g., workshops, in-services). Eventually, community members

211 requested a research project on services but reported they did not have the bandwidth to lead the  
212 project. Thus, all decided to engage in CBPR and work together in order to produce knowledge  
213 for advocacy (Wallerstein & Duran, 2006, 2010). There were no selection criteria other than  
214 interest from initial discussions. A next step was to tailor partnership.

### 215 *Recognizing the Community as a Unit of Identity*

216 Partners recognized the community as being grounded in race plus autism (Annamma et  
217 al., 2013; Crenshaw, 1989). While individuals have their own identities, whether one is perceived  
218 as minoritized shapes experiences (Hobbs, 2014). All partners shared experiences of racism,  
219 sexism, and ableism on the basis of how others perceived their skin tone, physiological traits, and  
220 differences from social norms. For example, one shared that others often assumed they were  
221 Latinx and spoke Spanish as a first language on the basis of their physical appearance; it did not  
222 matter that neither assumption corresponded to their actual identity. Others shared researchers  
223 were dismissive of them when they believed they were just minoritized and became inclusive  
224 when they learned they had lived experiences, but there was no one lived experience. Thus,  
225 partners defined the community as intersectional, recognizing heterogeneity was important.

### 226 *Complex Contexts*

227 In discussing the environment for CBPR, community partners felt researchers and other  
228 authority figures (e.g., doctors) used a deficit-driven lens to describe minoritized autistic  
229 individuals. Consistent with prior work norms (Onovbiona et al., 2023; Weitlauf et al., 2024),  
230 many felt practitioners assumed they were of low SES based on skin color or made assumptions  
231 about them on the basis of SES indicators (e.g., assuming they knew nothing about autism  
232 because of having a high school education). In both cases, SES failed to reflect their experiences  
233 (Powell, 2012; Swilley-Martinez et al., 2023). For example, while one community partner had a

234 graduate degree and a secure job that provided for their family, being the sole caregiver for Black  
235 autistic children with constant support needs who faced racism in the educational system meant  
236 they were exhausted. Coupled with their own lived experiences as a Black adult with difficulty  
237 accessing language, this partner felt they had reduced access to services for themselves and their  
238 children. The partner felt the issue was not just racism or ableism, but rather, a confluence of  
239 factors. Given accounts like these, to show cultural humility and that the study was designed  
240 with minoritized autistic individuals in mind (Lewis & Oyserman, 2016), partners opted to focus  
241 on social-ecological factors. They felt including SES would require an investigation beyond the  
242 scope of this study, such as how U.S. immigration policy differently impacted diaspora grouped  
243 under one label (e.g., Latine) differed in ethnicity, professional background, and income.

#### 244 *Use of a Social-Ecological Model*

245         Given multi-level domains of influence (Bronfenbrenner, 1977), partners chose to focus  
246 on topics that had spurred their decision to engage in CBPR: desired services and environmental  
247 impacts in their experiences (NIMHD, 2017). One community partner shared they and their  
248 spouse, who was also minoritized, struggled to obtain services for their child in secondary school.  
249 While they did not feel as sense of belonging to their community, given racism, they also felt  
250 school resistance to providing services was not due to racism. Rather, as a school-based provider,  
251 they believed this was typical behavior, as schools in their area were known for denying services  
252 in secondary education; in turn, they felt practitioners internalized this systems-wide practice.  
253 That is, practitioners reacted to the language skills of their child and decided services were not  
254 needed on the basis of community norms (not providing services), amid broader societal norms  
255 (federal policy for special education services).

#### 256 *Building Upon Community Strengths*

257 In developing roles and procedures, given community strengths (CTSA, 2011), a focus  
258 was co-learning and deciding how to build capacity. In reviewing prior work (Nicolaidis &  
259 Raymaker, 2015), community partners found it did not meet their priorities. While race and  
260 disability were parts of them, they did not define them. Rather, partners felt their own identities  
261 and their communities were nuanced. Thus, instead of naming cultural values with a 1:1 ratio  
262 (e.g., respect is important in  $x$  culture), partners focused on sharing strengths and values in their  
263 community (e.g., learning about and keeping cultural knowledge and traditions alive across  
264 backgrounds). Next, partners related these strengths to one another and connected them to the  
265 research process, such the importance of lived experience for developing research methods and  
266 of community values for project completion (e.g., agency and cultural humility to support  
267 accessibility and collaboration). Building upon strengths also meant emphasizing academic  
268 partners could provide supports, but those did not replace community strengths.

### 269 ***Building Equitable Partnership***

270 Developing equity in the partnership involved multiple levels of dynamics (Israel et al.,  
271 2003). Each partner recognized they had their own lived experiences, access needs, and life  
272 demands. Such humility facilitated flexibility in scheduling and co-learning. If a partner  
273 indicated written text was inaccessible and verbal communication was a strength, they received  
274 study materials in writing, discussion at meetings, and individual follow-up for further discussion.  
275 Relational humility also led to using consensus for decision-making. Each partner could propose  
276 a decision and share their opinion. Others were to listen to understand versus listen to respond. If  
277 consensus was not met, partners would re-enter discussion; however, this did not occur. Power  
278 sharing involved tailoring diversity representation and formal agreements. One partner relayed a  
279 white non-autistic researcher had invited them to join a community advisory board of “autistic

280 people with one other identity.” While this reflected researcher bias (Major & O’Brien, 2005), it  
281 also led to tokenization (Maye et al., 2021). Other partners had similar experiences. Thus, all  
282 opted to have autonomy in how individuals represented themselves versus using positionality  
283 statements. Further, while partners developed a collective agreement on roles and responsibilities  
284 (e.g., research partners would consent participants, collect data, and present de-identified data;  
285 all would support conceptualization, study design, recruitment, analysis, and dissemination),  
286 formal agreements were not a cultural norm for all. Thus, partners regularly reviewed this  
287 agreement at meetings and considered it as a living document.

### 288 ***Balancing Knowledge with Action for Mutual Benefit***

289 In planning research for action, community partners shared research priorities, which  
290 involved advocacy to inform policy (Israel et al., 2010). Research partners shared what they  
291 could support. Partners also discussed grants. In the past, researchers approached two community  
292 partners to “partner” on grants. One demanded a letter of support, which would have entailed the  
293 community partner completing a substantial amount of work, without asking if they wanted to be  
294 a partner or offering compensation. Another researcher paid minoritized autistic advisory board  
295 consultants \$200 for five years of work but did not notify them that faculty consultants received  
296 over \$200 per hour or that they had millions of dollars in grant funding. Here, the first author met  
297 with community partners to develop a plan for supporting them beyond the project (e.g., building  
298 professional skills) and grant proposals. In developing a proposal, community partners initially  
299 requested \$50 per hour. When a faculty consultant later requested \$200 per hour, the first author  
300 shared this information with partners, reviewed their contributions, asked if they wanted to adjust  
301 their rate, and revised the budget to \$200 per hour for all consultants. Research partners also  
302 determined how to provide resources to community partners in non-monetary ways, such as by

303 supporting organizations that aligned with community priorities (e.g., helping organizations  
304 obtain funding). In all cases, mutual benefit involved transparency in the research process.

305 ***Shared Community Dissemination***

306 To disseminate findings, a key issue was balancing community partner involvement with  
307 equity (Israel et al., 2003). Community partners voiced priorities, which were to share findings  
308 locally and nationwide to increase awareness about services for self-advocates, families, and  
309 policymakers. This resulted in joint planning of an in-person community workshop, a virtual  
310 webinar for an advocacy network, a podcast, and social media posts. Community partners felt  
311 they had expertise in dissemination via social media and podcasting and asked for support in  
312 other areas. Accordingly, research partners coordinated logistics for the workshop and webinar,  
313 translated community partner ideas into preliminary dissemination materials, and revised them to  
314 align with community partner priorities. Research partners also took the lead on translating  
315 discussion about engagement strategies, scheduling, and event coordination (e.g., flow of  
316 activities, accessibility needs, set-up, personnel support) into action.

317 ***Commitment to Sustained Partnership for Change***

318 The partnership informing this study began years before research, such that there was  
319 trust between community partners and the research team (Wallerstein et al., 2008). Yet once  
320 CBPR began, it was important for partners to directly discuss their commitment. Community  
321 partners spoke about their lived and family experiences with educational and healthcare systems.  
322 Their motivation was to have intersectional representation in the evidence base and to ensure  
323 CBPR led to advocacy and promotion of health equity. Research partners shared ways in which  
324 community partners were critical to science, clinical practice, and training (e.g., lack of  
325 representation means diagnostic criteria may fail to reflect the autistic population; Durkin et al.,

326 2015). Their motivation for engaging in CBPR was to support communities by offering support  
327 (e.g., funding, personnel) as professionals with specific research skills that did not replace the  
328 expertise, experiences, priorities, or concerns of community partners. These interactions helped  
329 partners understand that researchers respected them for them, would advocate for them in  
330 different contexts (e.g., university, policymaking), and were committed to long-term partnership.

### 331 *Engaging in Iterative, Cyclical CBPR*

332 Engaging in CBPR resulted in new insight and research, with revision to the partnership.  
333 Community partners felt they had increased capacity to effect change, suggested new CBPR  
334 projects (e.g., self-determination in navigating care systems), and expressed an interest in taking  
335 on more power in research (e.g., as co-principal investigators and co-investigators). Research  
336 partners felt they had a better understanding of gaps in the evidence base and contexts underlying  
337 historical mistrust of research (Wallerstein et al., 2008). For example, a university wanted to  
338 feature partners in a donor publication. All partners agreed the coverage could support advocacy.  
339 However, after mutually agreeing upon photoshoot content, university administrators notified a  
340 junior research partner they changed the photoshoot without obtaining their consent. The  
341 photoshoot was to take place in another lab with equipment the partner did not use, as the  
342 university decided the lab and equipment of the research partner were not donor-worthy. This  
343 unilateral decision was of severe ethical concern to all, such that the research partner had to  
344 firmly explain to the university why they would not participate in the photoshoot. Ultimately, the  
345 university . This experience required reflection upon CBPR principles and underlined the  
346 responsibility of showing respect to communities through action (Wallerstein et al., 2019)

### 347 **Procedures**

348 Participant selection criteria were: (a) racially minoritized, ethnically minoritized, or both

349 racially and ethnically minoritized per U.S. Census guidelines, which included groups other than  
350 non-Hispanic white: American Indian or Alaska Native, Asian, Black or African American,  
351 Native Hawai'ian or Pacific Islander, multiracial, and other for race and Hispanic/Latine for  
352 ethnicity (Office of Management and Budget [OMB], 1997); (b) met DSM-5 criteria for autism  
353 (APA, 2013), per self-report of a formal diagnosis in screening and independent confirmation  
354 using the Social Responsiveness Scale-2<sup>nd</sup> Ed. (SRS-2; Constantino, 2012) plus expert clinical  
355 judgment (i.e. administration by trained research staff and review by a clinical psychologist); (c)  
356 ages 13 to 30, coinciding with approximately when transition planning begins in the U.S. and 10  
357 years post-federal eligibility for special education services ("Every Student Succeeds Act," 2015);  
358 (d) proficiency in English per self-report during screening, as assessments were in English; (e)  
359 adequate hearing and vision thresholds for responding to human speech and computer screen  
360 images; and (f) use of primarily spoken language to communicate, as study activities required  
361 producing oral responses. Selection criteria for caregivers were: (a) active caregiving role for  
362 autistic participants; (b) proficiency in English, as interviews were completed in English; and (c)  
363 adequate hearing and vision thresholds for completing study activities. Exclusion criteria were:  
364 minimal spoken language, per self- or caregiver-report; and lack of adequate internet access. No  
365 participants were excluded, but if so, they were eligible to participate in a separate study on  
366 communication.

367 Recruitment took place in a multi-step process: (a) sharing study flyers with community  
368 and advocacy organizations serving minoritized autistic adolescents and adults by email, (b)  
369 providing consultation to interested individuals or individuals and families about the study in  
370 their modality of choice (phone, Zoom, email), (c) obtaining informed consent using a dynamic  
371 process, and (d) collecting data. The research team reviewed consent and assent forms,



372 encouraged families to ask questions, and explained different options for sharing data (no data,  
373 de-identified data, transcripts, audio-recordings). Adults 18 and older who were their own legal  
374 guardian provided informed consent. Adults who were not their own legal guardians and those  
375 under 18 provided assent, and legal guardians provided informed consent. Recruitment and data  
376 collection took place from 2022 to 2023 remotely on HIPAA-compliant Zoom, using a stopping  
377 rule of  $N = 68$  to account for possible 15% attrition. A Monte Carlo simulation determined the  
378 minimum detectable effect was 0.21 (a medium effect size), which was feasible for a sample of  
379 60; however, participant referrals led to  $N = 73$ . The first author administered an assessment  
380 protocol, including questionnaires, to participants and caregivers, on Zoom.

## 381 **Measures**

### 382 *Race, Ethnicity, Sex at Birth, and Gender*

383 Participants reported race, ethnicity, sex assigned at birth, and gender; see Table 1.  
384 Respondents selected one or more options for race: American Indian or Alaska Native, Asian,  
385 Black or African American, Native Hawai'ian or Pacific Islander, and white (OMB, 1997).  
386 Respondents could also write in options, which allowed for inclusion of categories added to the  
387 U.S. Census after data collection took place, such as Middle Eastern/North African (OMB, 2024).  
388 However, given few participants for specific combinations under multiracial, the team consulted  
389 the institutional review board office about privacy. If  $n < 5$ , full reporting was deemed to be  
390 potentially identifiable. Hence, reporting of multiracial categories is non-exclusive (i.e., someone  
391 in multiracial was also included in multiple racial categories, such as white and Black). Race,  
392 ethnicity, and gender were excluded from analysis, as they are complex constructs beyond the  
393 scope of this study (American Psychological Association, 2019). Sex at birth was also excluded,  
394 as prior work tends to confound sex at birth with gender (Halladay et al., 2015).

395 *Language, NVIQ, and Autism Traits*

396 Participants completed normed assessments across language domains (Girolamo et al.,  
397 2023b; Magiati et al., 2014), which align with clinical practice patterns for service eligibility in  
398 the U.S. (Burke et al., 2024; Selin et al., 2022); see Table 2. Overall receptive-expressive  
399 language was assessed by the Clinical Evaluation Language Fundamentals-5<sup>th</sup> Ed., normed up to  
400 age 21 ( $M = 100$ ,  $SD = 15$ ; Wiig et al., 2013). Age 21 norms were used for participants over age  
401 21, per prior work on adults ages 18 to 49 (Botting, 2020; Clegg et al., 2021; Fidler et al., 2011).  
402 Receptive and expressive vocabulary were assessed by the Peabody Picture Vocabulary Test-5<sup>th</sup>  
403 Ed. (Dunn, 2019) and Expressive Vocabulary Test-3<sup>rd</sup> Ed. ( $M = 100$ ,  $SD = 15$ ; Williams, 2019).  
404 Nonword repetition was assessed by percent accuracy on the Syllable Repetition Task (Shriberg  
405 et al., 2009). To contextualize language skills, given autism diagnostic criteria (APA, 2013;  
406 WHO, 2022), nonverbal general cognitive ability was assessed using the Raven's Progressive  
407 Matrices-2<sup>nd</sup> Ed. ( $M = 100$ ,  $SD = 15$ ; Raven et al., 2018). The Raven's does not require verbal  
408 language for completion, which mitigates confounds in scores (Grondhuis et al., 2018). Last,  
409 given attention to the role of autism traits in patterns between language and NVIQ (Bal et al.,  
410 2016), autism traits were measured using the SRS-2, which has caregiver and self-report forms  
411 for students and adults (Constantino, 2012). Item scores provide subscale raw and  $t$ -scores for  
412 restricted and repetitive behaviors, social communication impairment, and overall autism traits  
413 (sub-clinical: 59 or below; mild: 60 to 65, moderate: 66 to 75; high: 76 or above).

414 *Social-Ecological Factors*

415 Sense of community was assessed by the Brief Sense of Community Scale, a validated  
416 scale for diverse youth and adults (Peterson et al., 2008). Respondents rate eight statements from  
417 strongly disagree to strongly agree on a five-point scale. Item scores are averaged to provide an

418 overall score, with higher scores indicating higher sense of community. Current educational  
419 enrollment was assessed by respondent report: enrollment status in educational programming  
420 (yes/no) and type of programming if applicable (junior high, high school, specialized high school  
421 program, college courses, post-secondary program, other). To assess services, this study  
422 measured number of services received, unmet service needs, and barriers to services, as in Taylor  
423 and Henninger (2015). Respondents selected if they received each service: psychological or  
424 mental health; social work; speech-language therapy or communication; physical therapy;  
425 occupational therapy or life skills therapy or training; disability-related medical services; career  
426 counseling, job skills training, or vocational education; tutoring; transportation; assistive  
427 technology; audiology; orientation and mobility; reader or interpreter; respite care; and other. If  
428 services were not received, respondents indicated if each service was an unmet need and if each  
429 of 12 items were barriers to having service needs met; see Tables 3 and 4. Services received and  
430 unmet needs included “other,” with a write-in option.

### 431 **Data Processing**

432 Two research assistants independently scored and checked measures. All disagreements  
433 were discussed until consensus was reached. NVIQ was auto-scored within its testing platform.  
434 Data were checked for missingness and replaced using predictive mean matching with one  
435 imputation in SPSS 29 (IBM Corp., 2023; Little & Rubin, 2019): language and NVIQ scores ( $n$   
436 = 1; did not complete assessment); SRS-2 scores ( $n = 2$ ;  $n = 1$  missing form,  $n = 1$  did not  
437 complete the SRS-2); and educational programming ( $n = 1$ ; did not answer question). For the  
438 categorical approach, data were coded as follows: a) language impairment as  $\leq -1.25 SD$  on  $\geq 2$   
439 measures: CELF-5 Receptive Language Index, CELF-5 Expressive Language Index, SRT  
440 percent accuracy, PPVT-5 standard score, EVT-3 standard score (Girolamo & Rice, 2022;

441 Tomblin et al., 1997); b) ID as NVIQ < 70 (APA, 2013); and high levels of autism traits as SRS-  
442 2 total *t*-scores > 76 (Constantino, 2012). For the continuous approach, language scores were  
443 checked for multicollinearity using variance inflation factors (VIF). As  $VIF \geq 5$ , CELF-5 core  
444 language scores, which had the highest correlations with other language measures, were used. To  
445 facilitate interpretation, CELF-5 core language scores and NVIQ were centered on  $M = 100$ , and  
446 SRS-2 total *t*-scores were centered on the sub-clinical threshold of 59. Educational enrollment  
447 was coded as enrolled or not, as secondary and post-secondary distributions were similar and as  
448 Mann-Whitney U tests revealed nonsignificant differences in median counts for services received,  
449  $U = 158, z = -.12, p = .916$ ; unmet needs,  $U = 178, z = .49, p = .642$ ; and barriers,  $U = 123.5, z =$   
450  $-1.18, p = .245$ .

#### 451 **Analysis**

452 To address the first research question, services questionnaires were analyzed descriptively  
453 to obtain means, standard deviations, and ranges for total number of services received, unmet  
454 service needs, and barriers to services. To address the second question, primary outcome  
455 measures were rate ratios and secondary outcomes were effect sizes. Analyses used an *a priori*  
456 significance level of .05. Given sample size, correlations identified significant effects to use in  
457 analysis. As data were non-normally distributed, Spearman (1904) correlations were used. Next,  
458 negative binomial regressions with a log link function and robust variance estimator separately  
459 estimated the extent to which number of services received, unmet service needs, and barriers to  
460 services were predicted from categorical traits (LI, ID, high level of autism traits) and social-  
461 ecological variables (sense of community, educational enrollment; Coxe et al., 2009). Negative  
462 binomial regression is appropriate for over-dispersed count data, in that the variance can be  
463 higher than the mean and the number of discrete events varies from person to person and setting

464 to setting (Cameron & Trivedi, 2013; Gardner et al., 1995). Regression analyses were repeated  
465 with continuous traits (CELF-5 core language scores centered on 100, SRS-2 total *t*-scores  
466 centered on 59, and NVIQ centered on 100). Prior to analysis, model results were checked for  
467 linearity, normality, and homogeneity of variance.

## 468 **Results**

### 469 **Participant Flow**

470 Participants were 73 autistic individuals; see Table 1. Caregivers ( $N = 52$ ) included  
471 47 mothers, 2 grandparents, 2 fathers, and one sibling. The female-to-male ratio for sex assigned  
472 at birth and gender was approximately 1:2. Over half were enrolled in educational programming,  
473 28 of whom were in secondary education. Most participants (54.79%) met criteria for LI; see  
474 Table 2. Six (8.22%) had  $NVIQ < 70$  and met criteria for ID, and 15 (20.55%) had  $NVIQ$  of 70  
475 to 84. Levels of autism traits varied: high ( $n = 33$ , or 45.21%), moderate ( $n = 19$ , or 26.03%),  
476 low ( $n = 10$ , or 13.70%), and subclinical ( $n = 11$ , or 15.1%).

### 477 **Patterns in Services Received, Unmet Service Needs, and Barriers to Services**

478 On average, participants received more than three services ( $M = 3.67$ ,  $SD = 2.76$ ), with a  
479 range from 0 to 12; see Figure 1. Nearly all received at least one service (93.15%), over three-  
480 quarters received at least two services (76.71%), and more than one-half received at least three  
481 services (58.90%). A majority of participants received psychological or mental health services  
482 (65.75%) and disability-related medical services (54.79%), while approximately one-third  
483 received speech-language or communication services (34.25%); see Table 3. Participants  
484 reported over three unmet service needs ( $M = 3.32$ ,  $SD = 3.20$ , range = 0-14). Over three-quarters  
485 reported at least one unmet service need (78.08%), and over two-thirds reported at least two  
486 service needs (67.12%). Of those not receiving a given service, the most common unmet service

487 needs pertained to adulthood: career counseling or job skills training (64.71%) and occupational  
488 or life skills therapy or training (50%). The next highest unmet service need pertained to more  
489 global access, speech-language services and communication services (45.83%). Of services not  
490 received, most felt school-based services (e.g., in-class aide, tutor, reader or interpreter), access  
491 (assistive technology, audiology, orientation and mobility), and respite were not needed. Overall,  
492 even when receiving multiple services, participants had multiple unmet service needs.

493 Participants also reported multiple barriers to services ( $M = 5.52$ ,  $SD = 3.31$ , range = 0-  
494 11); see Table 4. A majority of the sample endorsed each of the 12 possible barriers to services,  
495 which primarily pertained to access: location (68.49%), services not available (67.12%),  
496 insurance not accepted (58.90%), ineligible (56.16%), cost (54.79%), getting information about  
497 services (54.79%), and scheduling conflicts (50.68%). Nearly all participants reported at least  
498 one barrier (87.67%), over three-quarters reported at least three barriers (78.08%), and over half  
499 reported at least six barriers (52.05%). In all, participants received multiple services, unmet  
500 needs, and barriers.

## 501 **Predictors of Services Received, Unmet Needs, and Barriers**

### 502 *Categorical Approach to Language, NVIQ, and Autism Traits*

503 Spearman correlations revealed no significant relationships between services received,  
504 unmet needs, and barriers; see Table 5. Thus, receiving more services was not necessarily tied to  
505 fewer unmet needs or barriers. There were small to moderate effects of individual difference and  
506 social-ecological variables on each services outcome. Receiving more services was associated  
507 with having LI, having ID, and being enrolled in education. Descriptively, effect sizes of LI and  
508 educational enrollment were nearly twice that of ID. High levels of autism traits and lower sense  
509 of community were associated with more unmet service needs, and to a lesser extent, more

510 barriers. There were few patterns among predictors. Having LI was associated with having ID,  
511 and lower sense of community was associated with high levels of autism traits.

512 Separate negative binomial regression models significantly predicted the number of  
513 services received and unmet service needs but not barriers; see Table 6. In the first model, for an  
514 individual without ID, without LI, and not in educational programming, the number of services  
515 received was 1.97. Holding all other variables constant, the number of services received was 1.70  
516 times greater if an individual had LI than not (4.42 versus 2.60 services) and 1.56 times greater if  
517 in educational programming versus not (4.24 versus 2.71 services). The effect of ID was not  
518 significant. Next, analysis examined unmet service needs. The number of unmet service needs  
519 was 5.52 for an individual without high levels of autism traits and a sense of community score of  
520 3.06, which roughly corresponds with neither agree nor disagree. Accounting for all variables,  
521 the number of unmet needs in individuals with high levels of autism traits was 1.82 times greater  
522 than those without (i.e., lower than) high levels of autism traits (4.29 versus 2.36 needs). In sum,  
523 receiving more services was tied to LI and educational enrollment, while unmet service needs  
524 only involved high levels of autism traits.

### 525 *Continuous Approach to Language, NVIQ and Autism Traits*

526 When using continuous measures of overall language, NVIQ, and autism traits, effects  
527 somewhat differed from the categorical approach; see Table 7. Services variables did not  
528 necessarily correspond with one another, but there was a significant, moderate positive  
529 association between barriers to services and unmet service needs. As in the categorical approach,  
530 there were small to moderate effects of language, NVIQ, and educational enrollment on services  
531 received. Lower language scores, lower NVIQ, and being in educational programming  
532 significantly associated with receiving more services, but the effect size of NVIQ was 1.75 times

533 larger than that of intellectual disability ( $\rho = -.42$  versus  $\rho = .24$ ). Effects of SRS-total  $t$ -scores  
534 and sense of community on number of unmet service needs and barriers were similar to the  
535 categorical approach. Higher SRS-2 total  $t$ -scores associated with more unmet needs and barriers,  
536 and sense of community showed the opposite pattern. Other differences pertained to predictor  
537 variables. Lower sense of community associated with higher SRS-2 total  $t$ -scores, and higher  
538 CELF-5 core language scores associated with NVIQ. However, the effect size of NVIQ with  
539 CELF-5 scores was over two times larger than that of intellectual disability ( $\rho = .59$  versus  $\rho$   
540  $= .27$ ). Last, higher CELF-5 core language scores were associated with not being in educational  
541 programming. In all, patterns varied when using a continuous approach to language, NVIQ and  
542 autism traits: 1) significant associations between unmet needs and barriers, as well as CELF-5  
543 core language scores and educational enrollment, and 2) stronger associations between NVIQ  
544 than intellectual disability and CELF-5 core language scores, as well as educational enrollment.

545 As in the categorical approach, separate negative binomial regression models were  
546 statistically significant for number of services received and unmet service needs but not barriers;  
547 see Table 8. However, effects differed. Number of services received was predicted by educational  
548 programming, but not CELF-5 core language scores or NVIQ. For a participant with NVIQ of  
549 100, CELF-5 core language score of 100, and not in educational programming, the average  
550 expected number of services received was 2.11. Holding all other variables constant, the number  
551 of services received was 1.48 times greater if in educational programming versus not (4.07  
552 versus 2.75 services); in comparison, the rate ratio was 1.56 in the categorical approach. Turning  
553 to unmet service needs, for an individual with a sense of community score of 3.06 (roughly  
554 indicating neither agree nor disagree) and an SRS total  $t$ -score of 59 (corresponding to the sub-  
555 clinical threshold for autism traits), the expected number of unmet service needs was 4.50.



556 When accounting for all other variables, the number of unmet needs was 1.03 times greater for  
557 every one-unit increase in SRS-2 total *t*-scores above 59; in contrast, the rate ratio of high level  
558 of autism traits was 1.82. Findings indicate receiving more services was tied only to educational  
559 enrollment, while unmet service needs appeared to be tied to SRS-2 total *t*-scores.

## 560 **Summary**

561 Participants received multiple services yet reported multiple unmet service needs and  
562 barriers to having service needs met. Categorical versus continuous approaches to characterizing  
563 language, NVIQ, and autism traits yielded different outcomes in correlation and analyses. Some  
564 correlations became nonsignificant in regression. In particular, LI, but not language scores,  
565 predicted receiving more services.

## 566 **Discussion**

567 In evaluating services in minoritized autistic adolescents and adults varying in language  
568 skills, this study used CBPR to focus on the intersection of race and disability. All partners  
569 agreed upon conceptual frameworks for contexts underlying CBPR and services (Annamma et  
570 al., 2013; Plaut, 2010). This approach informed interpretation of the findings.

## 571 **Clinical Implications**

572 The premise of this study was that broad inclusion in research is crucial for evidence-  
573 based practice (Sackett et al., 1996). Participants, 39.73% of whom were in high school, reported  
574 3.34 services received and 3.32 unmet needs. Compared to prior work, the number of services  
575 received was similar to autistic youth and adults in their last year of high school ( $n = 3.05$ ), while  
576 the number of unmet needs was higher ( $n = 1.85$ ; Taylor & Henninger, 2015). In contrast, the  
577 number of services received was lower than autistic adolescents and adults ( $n = 6.13$ ), 40.8% of  
578 whom were in high school, while the number of unmet needs was similar ( $n = 3.18$ ; Ishler et al.,

579 2022, 2023). Beyond high school enrollment and racial diversity, studies differed in other ways.  
580 Less than 10% of participants had co-occurring ID using an NVIQ measure versus 27% via  
581 caregiver report in Ishler et al. (2022) and 30.8% in Taylor and Henninger (2015) using an IQ  
582 measure that requires verbal language. Without directly comparable measures, determining  
583 similarities across samples is challenging. Regardless, individual service variables suggest there  
584 were differences. Relative to other studies, participants in this study were approximately two-  
585 thirds to over two times less likely to receive transportation or social work services (Ishler et al.,  
586 2023); three to eight times more likely to endorse speech-language, transportation, and personal  
587 assistant or aide services as unmet service needs (Taylor & Henninger, 2015); and more likely to  
588 endorse each barrier to services except for language (Koffer Miller et al., 2022; Newman et al.,  
589 2011; Taylor & Henninger, 2015); see Supplementary Table 3. While mean counts for services  
590 received and unmet needs appear similar, closer inspection points to qualitative differences.

591 A second dimension of nuance involves different approaches to measuring clinical  
592 characteristics. Care systems often use categorical cutoffs, such as LI or ID (ESSA, 2015; IDEIA  
593 of 2004, 2018), despite heterogeneity in both language and NVIQ across the autism spectrum  
594 (Bal et al., 2016; Schaeffer et al., 2023). Here, a continuous approach (language scores, NVIQ,  
595 autism trait scores) yielded different patterns than a categorical approach (LI, ID, high level of  
596 traits): there were significant associations between language and educational enrollment which  
597 were nonsignificant in the categorical approach, and there was a stronger association between  
598 language and NVIQ than in the categorical approach. These differences raise the question of  
599 clinical significance. For instance, Johnson et al. (1999) found a research definition of LI in  
600 autistic and nonautistic adults yielded a higher estimate than clinical judgment of LI (11.7%  
601 versus 5.5%). Here, over 55% of participants qualified for LI (Tomblin et al., 1997), which

602 predicted the number of services received. Nearly two-thirds (64.39%), however, received  
603 speech-language services (34.25%) or reported speech-language services as an unmet need  
604 (30.14%). Given this disproportionality, it is unknown whether the operational definition of LI in  
605 this study aligns with clinical judgment or if aspects of language (e.g., pragmatics, discourse)  
606 influenced service patterns (Schaeffer et al., 2023). Ultimately, differences across samples and  
607 approaches to measurement underline the importance of assessing all areas where individuals  
608 may want support (Musgrove, 2015).

### 609 **Implications for Autistic Adolescents and Adults**

610 Findings also point to the relevance of contextual factors in services (Bronfenbrenner,  
611 1977; NIMHD, 2017). Predictors did not significantly predict barriers to services. However,  
612 higher levels of autism traits and a lower sense of community were each associated with one  
613 another, as well as with more barriers. Taking race and disability as social constructs (Annamma  
614 et al., 2013), it could be that barriers to services, sense of community, and autism traits reinforce  
615 one another. On one hand, minoritized autistic individuals and families face systemic barriers to  
616 services, including lack of practitioner knowledge about cultural norms (Onovbiona et al., 2023;  
617 Pham & Charles, 2023; Weitlauf et al., 2024), amid little knowledge overall on sociocultural  
618 variation in perceptions about autism (Golson et al., 2022). Beyond hindering access to services,  
619 these gaps may negatively impact sense of community (Gulsrud et al., 2021; Michalski et al.,  
620 2020). Barriers to services may also explain why minoritized autistic youth are  
621 disproportionately likely to have high unmet support needs (Hughes et al., 2023). Elucidating  
622 relationships between barriers to services, contextual factors (e.g., sense of community), and  
623 clinical expertise (Wolfson et al., 2000) using person-centered measures is critical for developing  
624 evidence-based practice to promote health equity (Sackett et al., 1996).

625 This study also tailored CBPR for a localized context, given a lack of precedent for  
626 complex contexts that community partners saw as relevant, such as disclosure (Fletcher-Watson  
627 et al., 2019), individual identity (Nicolaidis & Raymaker, 2015), and equity in partnership,  
628 mutual benefit, and community dissemination (Israel et al., 2003). To share power (Wallerstein et  
629 al., 2019), partners used the same approach to conceptualize representation on the team as in  
630 participants: attending to heterogeneity within minoritized autistic individuals versus checking a  
631 box (Plaut, 2010). This approach provided a pathway to partnering with community members  
632 who research systematically excludes as members of the scientific community and as participants  
633 (Maye et al., 2021). Sustaining these inclusive partnerships is the next step to producing the best-  
634 available evidence and clinical practice (Sackett et al., 1996).

### 635 **Limitations**

636 This study encountered several limitations. First, analysis did not include SES, which has  
637 shown inconsistent effects on services (Eilenberg et al., 2019; Levine et al., 2007). As a complex  
638 construct (American Psychological Association, 2021), prior effects of SES were unclear. Some  
639 studies examined household income and found negative effects on services received and unmet  
640 service needs (Laxman et al., 2019; Shattuck et al., 2011) or no effects on services received,  
641 unmet service needs, and barrier (Ishler et al., 2023; Taylor & Henninger, 2015). Family financial  
642 burden, which is specific to individual need, predicted barriers to services (Ishler et al., 2023);  
643 however, it may not be broadly applicable, such as for individuals who do not have families. This  
644 study also did not examine associations between services and age. While federal special  
645 education affords eligibility for services until age 21 ("IDEIA of 2004," 2018), compulsory  
646 special education age limits vary from 18 to 22 (National Center for Education Statistics, 2024)  
647 and rose during the pandemic. Without detailed information on individual eligibility, age and

648 services associations may be challenging to interpret. A second limitation was not reporting  
649 detailed participant information, including exact multiracial categories or type of educational  
650 programming. Concerns about making participants re-identifiable (O'Keefe & Rubin, 2015), plus  
651 institutional review board consultation, led to not reporting precise information. Larger sample  
652 sizes are needed to balance privacy with full reporting. Third, this study used counts to measure  
653 services. As supported by qualitative evidence (Anderson et al., 2018a), more nuanced measures,  
654 such as self-ratings of the extent of unmet service needs (Burke et al., 2024), may better inform  
655 our understanding of services.

### 656 **Future Directions**

657 Findings and limitations chart pathways forward to advance our understanding of  
658 services in minoritized autistic adolescents and adults for advocacy. First, heterogeneity within a  
659 100% minoritized sample in the presence and nature of services justified use of DisCrit and  
660 Diversity Science (Annamma et al., 2013; Plaut, 2010). What is unknown is how these theories  
661 inform larger-scale modeling of the transition to adulthood when accounting for both nuances in  
662 individual language and cognitive profiles plus environmental factors in services access. Prior  
663 work has examined broad patterns in large datasets (Song et al., 2022; Turcotte et al., 2016) and  
664 longitudinal change in individual studies (Laxman et al., 2019), but future work is needed to  
665 merge theory-founded approaches to heterogeneity with statistical methods. A second area for  
666 future research is improved measures for services (Burke et al., 2024), as well as social-  
667 ecological correlates (Anderson et al., 2018b). Here, sense of community was associated with  
668 services, but the clinical significance of this relationship is unknown. Given sociocultural  
669 variation in perceptions about autism (Rivera-Figueroa et al., 2022), understanding what sense of  
670 community in the context of services means across different individuals is complex. Determining

671 how to implement and use self-rating measures for services and sense of community may require  
672 particular attention and care (Douglas et al., 2022). These directions for research serve to  
673 advance knowledge and advocacy for minoritized autistic adolescents and adults.

#### 674 **Conclusion**

675 In using CBPR to study services received, unmet needs, and barriers in minoritized  
676 autistic adolescents and adults, this study began with lived experiences as expert opinion to guide  
677 investigation. Using theory-driven approaches to investigation, findings showed heterogeneity in  
678 the presence and nature of services. Correlates of services differed when using continuous or  
679 categorical approaches to language, NVIQ, and autism traits, further supporting the relevance of  
680 heterogeneity in characterizing the transition to adulthood. This approach and findings may  
681 support iterative development of evidence-based practice.

#### 682 **Acknowledgements**

683 We thank participants, families, community partners, and student assistants. This work  
684 was supported by an American Speech-Language-Hearing Foundation New Investigators  
685 Research Grant (PI: Girolamo) and NIH L70DC021323 (PI: Girolamo).

#### 686 **References**

- 687
- 688 Pub. L. No. 2022, (2022).
- 689 American Psychiatric Association. (2013). *Diagnostic and statistical manual of mental disorders:*  
690 *DSM-5* (5th ed.). American Psychiatric Association.
- 691 American Psychological Association. (2019). *Publication manual of the American Psychological*  
692 *Association: 7th Ed.* (7th ed.). Author.
- 693 American Psychological Association. (2021). *Equity, diversity, and inclusion in APA Journals.*  
694 Author. Retrieved July 29 from <https://www.apa.org/pubs/authors/equity-diversity-inclusion>
- 695 Anderson, C., Lupfer, A., & Shattuck, P. T. (2018a). Barriers to receipt of services for young  
696 adults with autism. *Pediatrics*, *141*(Supplement\_4), S300-S305.  
697 <https://doi.org/10.1542/peds.2016-4300G>
- 698 Anderson, K. A., Roux, A. M., Kuo, A., & Shattuck, P. T. (2018b). Social-ecological correlates in  
699 adult autism outcome studies: A scoping review. *Pediatrics*, *141*(Supplement 4), S306-S317.



- 700 <https://doi.org/10.1542/peds.2016-4300H>
- 701 Annamma, S. A. (2018). *The pedagogy of pathologization: Dis/abled girls of color in the school-*
- 702 *prison nexus*. Routledge.
- 703 Annamma, S. A., Connor, D., & Ferri, B. (2013). Dis/ability critical race studies (DisCrit):
- 704 Theorizing at the intersections of race and dis/ability. *Race Ethnicity and Education*, 16(1), 1-
- 705 31. <https://doi.org/10.1080/13613324.2012.730511>
- 706 Annamma, S. A., Connor, D. J., & Ferri, B. A. (2016). A truncated genealogy of DisCrit. In D. J.
- 707 Connoa, B. A. Ferri, & S. A. Annamma (Eds.), *DisCrit: Disability studies and critical race*
- 708 *theory in education* (pp. 1-8). Teachers College Press.
- 709 Arunachalam, S., & Luyster, R. J. (2016). The integrity of lexical acquisition mechanisms in
- 710 autism spectrum disorders: A research review. *Autism Research*, 9(8), 810-828.
- 711 <https://doi.org/https://doi.org/10.1002/aur.1590>
- 712 Autism. (2024). *Submission guidelines*. Retrieved May 18 from
- 713 <https://journals.sagepub.com/author-instructions/aut>
- 714 Bal, V. H., Katz, T., Bishop, S. L., & Krasileva, K. (2016). Understanding definitions of
- 715 minimally verbal across instruments: Evidence for subgroups within minimally verbal
- 716 children and adolescents with autism spectrum disorder. *Journal of Child Psychology and*
- 717 *Psychiatry*, 57(12), 1424-1433. <https://doi.org/10.1111/jcpp.12609>
- 718 Botting, N. (2020). Language, literacy and cognitive skills of young adults with developmental
- 719 language disorder (DLD). *International Journal of Language & Communication Disorders*,
- 720 55(2), 255-265. <https://doi.org/10.1111/1460-6984.12518>
- 721 Boucher, J. (2012). Research review: structural language in autistic spectrum disorder–
- 722 characteristics and causes. *Journal of Child Psychology and Psychiatry*, 53(3), 219-233.
- 723 Bronfenbrenner, U. (1977). Toward an experimental ecology of human development. *American*
- 724 *Psychologist*, 32(7), 513-531. <https://doi.org/10.1037/0003-066X.32.7.513>
- 725 Burke, M. M., Cheung, W. C., Best, M., DaWalt, L. S., & Taylor, J. L. (2024). Measuring what
- 726 matters: Considerations for the measurement of services for individuals with autism. *Journal*
- 727 *of Developmental and Physical Disabilities*, 36, 423-439. [https://doi.org/10.1007/s10882-023-](https://doi.org/10.1007/s10882-023-09916-6)
- 728 [09916-6](https://doi.org/10.1007/s10882-023-09916-6)
- 729 Burns, P. B., Rohrich, R. J., & Chung, K. C. (2011). The levels of evidence and their role in
- 730 evidence-based medicine. *Plastic and reconstructive surgery*, 128(1), 305-310.
- 731 <https://doi.org/10.1097/PRS.0b013e318219c171>
- 732 Butler, L. K., Shen, L., Chenausky, K. V., La Valle, C., Schwartz, S., & Tager-Flusberg, H.
- 733 (2023). Lexical and morphosyntactic profiles of autistic youth with minimal or low spoken
- 734 language skills. *American Journal of Speech-Language Pathology*, 32(2), 733-747.
- 735 [https://doi.org/10.1044/2022\\_AJSLP-22-00098](https://doi.org/10.1044/2022_AJSLP-22-00098)
- 736 Cameron, A. C., & Trivedi, P. K. (2013). *Regression analysis of count data*. Cambridge
- 737 University Press.
- 738 Cameron, L. A., Borland, R. L., Tonge, B. J., & Gray, K. M. (2022). Community participation in
- 739 adults with autism: A systematic review. *Journal of Applied Research in Intellectual*
- 740 *Disabilities*, 35(2), 421-447. <https://doi.org/10.1111/jar.12970>
- 741 Cardenas, I., Steiner, J. J., & Peterson, N. A. (2021). Measurement invariance of the Brief Sense
- 742 of Community Scale across non-Hispanic, Black and Hispanic college students. *Journal of*
- 743 *community psychology*, 49(6), 2106-2121. <https://doi.org/https://doi.org/10.1002/jcop.22640>

- 744 Carpiano, R. M., & Hystad, P. W. (2011). "Sense of community belonging" in health surveys:  
745 what social capital is it measuring? *Health & place*, 17(2), 606-617.  
746 <https://doi.org/10.1016/j.healthplace.2010.12.018>
- 747 Chen, J., Yao, D., Lin, S., Yuan, S., Wang, M., Wu, H., & Zhang, Q. (2024). Application of the  
748 community-based participatory research in autism spectrum disorder: A scoping review.  
749 *Review journal of autism and developmental disorders*. [https://doi.org/10.1007/s40489-024-](https://doi.org/10.1007/s40489-024-00446-1)  
750 [00446-1](https://doi.org/10.1007/s40489-024-00446-1)
- 751 Clegg, J., Crawford, E., Spencer, S., & Matthews, D. (2021). Developmental Language Disorder  
752 (DLD) in young people leaving care in England: A study profiling the language, literacy and  
753 communication abilities of young people transitioning from care to independence.  
754 *International Journal of Environmental Research and Public Health*, 18(8), 4107.  
755 <https://doi.org/10.3390/ijerph18084107>
- 756 Clinical and Translational Science Awards Consortium. (2011). *Principles of Community*  
757 *Engagement* (NIH Publication No. 11-7782). National Institutes of Health.
- 758 Constantino, J. N. (2012). *Social Responsiveness Scale, Second Edition*. W. P. Services.
- 759 Coxe, S., West, S. G., & Aiken, L. S. (2009). The analysis of count data: A gentle introduction to  
760 Poisson regression and its alternatives. *Journal of personality assessment*, 91(2), 121-136.  
761 <https://doi.org/10.1080/00223890802634175>
- 762 Crenshaw, K. (1989). Demarginalising the intersection of race and sex: A black feminist critique  
763 of antidiscrimination doctrine, feminist theory and antiracist politics. *University of Chicago*  
764 *Legal Forum*, 140, 25-42. <https://doi.org/10.4324/9781315582924-10>
- 765 Crenshaw, K. (1991). Mapping the margins: Intersectionality, identity politics, and violence  
766 against women of color. *Stanford Law Review*, 43(6), 1241-1499.  
767 <https://doi.org/10.2307/1229039>
- 768 Davis, A. M., Smith, E., Yang, X., & Wright, R. (2024). Exploring racial discrimination,  
769 disability discrimination, and perception of the future among Black-identifying emerging  
770 adults with and without autism in the United States: A mixed-methods descriptive study.  
771 *Journal of Child & Adolescent Trauma*. <https://doi.org/10.1007/s40653-024-00624-7>
- 772 Douglas, N. F., Feuerstein, J. L., Oshita, J. Y., Schliep, M. E., & Danowski, M. L. (2022).  
773 Implementation science research in communication sciences and disorders: A scoping review.  
774 *American Journal of Speech-Language Pathology*, 31(3), 1054-1083.  
775 [https://doi.org/10.1044/2021\\_AJSLP-21-00126](https://doi.org/10.1044/2021_AJSLP-21-00126)
- 776 Dunn, D. M. (2019). *Peabody Picture Vocabulary Test, Fifth Edition: Manual*. Pearson.
- 777 Durkin, M. S., Elsabbagh, M., Barbaro, J., Gladstone, M., Happe, F., Hoekstra, R. A., Lee, L. C.,  
778 Rattazzi, A., Stapel - Wax, J., & Stone, W. L. (2015). Autism screening and diagnosis in low  
779 resource settings: challenges and opportunities to enhance research and services worldwide.  
780 *Autism Research*, 8(5), 473-476. <https://doi.org/10.1002/aur.1575>
- 781 Eilenberg, J. S., Paff, M., Harrison, A. J., & Long, K. A. (2019). Disparities based on race,  
782 ethnicity, and socioeconomic status over the transition to adulthood among adolescents and  
783 young adults on the autism spectrum: A systematic review. *Current Psychiatry Reports*, 21(5),  
784 32. <https://doi.org/10.1007/s11920-019-1016-1>
- 785 Every Student Succeeds Act, Pub. L. No. 114-95, § 1001-1605 (2015).
- 786 Fidler, L. J., Plante, E., & Vance, R. (2011). Identification of adults with developmental language  
787 impairments. *American Journal of Speech-Language Pathology*, 20(1), 2-13.  
788 [https://doi.org/10.1044/1058-0360\(2010/09-0096\)](https://doi.org/10.1044/1058-0360(2010/09-0096))



- 789 Field, B., Booth, A., Ilott, I., & Gerrish, K. (2014). Using the Knowledge to Action Framework  
790 in practice: A citation analysis and systematic review. *Implementation science*, 9(1), 172.  
791 <https://doi.org/10.1186/s13012-014-0172-2>
- 792 Fletcher-Watson, S., Adams, J., Brook, K., Charman, T., Crane, L., Cusack, J., Leekam, S.,  
793 Milton, D., Parr, J. R., & Pellicano, E. (2019). Making the future together: Shaping autism  
794 research through meaningful participation. *Autism*, 23(4), 943-953.  
795 <https://doi.org/10.1177/1362361318786721>
- 796 Gardner, W., Mulvey, E. P., & Shaw, E. C. (1995). Regression analyses of counts and rates:  
797 Poisson, overdispersed Poisson, and negative binomial models. *Psychological Bulletin*,  
798 118(3), 392. <https://doi.org/10.1037/0033-2909.118.3.392>
- 799 Girolamo, T., & Rice, M. L. (2022). Language impairment in autistic young adults. *Journal of*  
800 *Speech, Language, and Hearing Research*. [https://doi.org/10.1044/2022\\_JSLHR-21-00517](https://doi.org/10.1044/2022_JSLHR-21-00517)
- 801 Girolamo, T., Shen, L., Gulick, A. M., Rice, M. L., & Eigsti, I. M. (2023a). Studies pertaining to  
802 language impairment in school-age autistic individuals underreport participant  
803 sociodemographics: A systematic review. *Autism*, 27(8), 2218-2240.  
804 <https://doi.org/10.1177/13623613231166749>
- 805 Girolamo, T., Shen, L., Gulick, A. M., Rice, M. L., & Eigsti, I.-M. (2023b). Studies assessing  
806 domains pertaining to structural language in autism vary in reporting practices and approaches  
807 to assessment: A systematic review. *Autism*. <https://doi.org/10.1177/13623613231216155>
- 808 Golson, M. E., Ficklin, E., Haverkamp, C. R., McClain, M. B., & Harris, B. (2022). Cultural  
809 differences in social communication and interaction: A gap in autism research. *Autism*  
810 *Research*, 15(2), 208-214. <https://doi.org/10.1002/aur.2657>
- 811 Grondhuis, S. N., Lecavalier, L., Arnold, L. E., Handen, B. L., Scahill, L., McDougle, C. J., &  
812 Aman, M. G. (2018). Differences in verbal and nonverbal IQ test scores in children with  
813 autism spectrum disorder. *Research in Autism Spectrum Disorders*, 49, 47-55.  
814 <https://doi.org/10.1016/j.rasd.2018.02.001>
- 815 Gulsrud, A., Lee, H. S., McGhee Hassrick, E., Iadarola, S., Pellicchia, M., Shih, W., Vejnaska, S.,  
816 Morgan, E., Hochheimer, S., Crabbe, S., Li, J., Hauptman, L., Castellon, F., Nuske, H., Garcia,  
817 C., King, R., Luelmo, P., Carley, K., Smith, T., & Stahmer, A. (2021). It's who you know:  
818 Caregiver social networks predict service use among under-resourced children with autism.  
819 *Research in Autism Spectrum Disorders*, 88, 101843.  
820 <https://doi.org/10.1016/j.rasd.2021.101843>
- 821 Halladay, A. K., Bishop, S., Constantino, J. N., Daniels, A. M., Koenig, K., Palmer, K.,  
822 Messinger, D., Pelphrey, K., Sanders, S. J., Singer, A. T., Taylor, J. L., & Szatmari, P. (2015).  
823 Sex and gender differences in autism spectrum disorder: summarizing evidence gaps and  
824 identifying emerging areas of priority. *Molecular autism*, 6(1), 36.  
825 <https://doi.org/10.1186/s13229-015-0019-y>
- 826 Hobbs, A. (2014). *A chosen exile: A history of racial passing in American life*. Harvard  
827 University Press.
- 828 Hughes, M. M., Shaw, K. A., DiRienzo, M., Durkin, M. S., Esler, A., Hall-Lande, J., Wiggins, L.,  
829 Zahorodny, W., Singer, A., & Maenner, M. J. (2023). The prevalence and characteristics of  
830 children with profound autism, 15 sites, United States, 2000-2016. *Public Health Reports*,  
831 138(6), 971-980. <https://doi.org/10.1177/00333549231163551>
- 832 IBM Corp. (2023). *IBM SPSS Statistics for Macintosh*. In (Version 29.0.2.0) IBM Corp.  
833 Individuals with Disabilities Education Act of 1997, Pub. L. No. 105-17, § 300 (1997).

- 834 Individuals with Disabilities Education Improvement Act of 2004, 20 U.S.C. § 1400 et seq.  
835 (2018).
- 836 Interagency Autism Coordinating Committee. (2023). *2021-2023 Strategic Plan for Autism*  
837 *Research, Services, and Policy*. U.S. Department of Health and Human Services Interagency  
838 Autism Coordinating Committee. <https://iacc.hhs.gov/publications/strategic-plan/2023/>
- 839 Ishler, K. J., Berg, K. A., Olgac, T., Obeid, R., & Biegel, D. E. (2023). Barriers to service and  
840 unmet need among autistic adolescents and young adults. *Autism*, 27(7), 1997-2010.  
841 <https://doi.org/10.1177/13623613221150569>
- 842 Ishler, K. J., Biegel, D. E., Wang, F., Olgac, T., Lytle, S., Miner, S., Edguer, M., & Kaplan, R.  
843 (2022). Service use among transition-age youth with autism spectrum disorder. *Journal of*  
844 *autism and developmental disorders*, 52(3), 1051-1065. [https://doi.org/10.1007/s10803-021-](https://doi.org/10.1007/s10803-021-04999-6)  
845 [04999-6](https://doi.org/10.1007/s10803-021-04999-6)
- 846 Israel, B. A., Coombe, C. M., Cheezum, R. R., Schulz, A. J., McGranaghan, R. J., Lichtenstein,  
847 R., Reyes, A. G., Clement, J., & Burris, A. (2010). Community-based participatory research:  
848 A capacity-building approach for policy advocacy aimed at eliminating health disparities.  
849 *American journal of public health*, 100(11), 2094-2102.  
850 <https://doi.org/10.2105/ajph.2009.170506>
- 851 Israel, B. A., Eng, E., Schulz, A. J., & Parker, E. A. (2003). Introduction to methods in  
852 community-based participatory research for health. In B. A. Israel, E. Eng, A. J. Schulz, & E.  
853 A. Parker (Eds.), *Methods in community-based participatory research for health* (pp. 3-38).  
854 John Wiley & Sons.
- 855 Johnson, C. J., Beitchman, J. H., & Brownlie, E. (2010). Twenty-year follow-up of children with  
856 and without speech-language impairments: Family, educational, occupational, and quality of  
857 life outcomes. *American Journal of Speech-Language Pathology*, 19(1), 51-65.  
858 [https://doi.org/10.1044/1058-0360\(2009/08-0083\)](https://doi.org/10.1044/1058-0360(2009/08-0083))
- 859 Johnson, C. J., Beitchman, J. H., Young, A., Escobar, M., Atkinson, L., Wilson, B., Brownlie, E.  
860 B., Douglas, L., Taback, N., & Lam, I. (1999). Fourteen-year follow-up of children with and  
861 without speech/language impairments: Speech/language stability and outcomes. *Journal of*  
862 *Speech, Language, and Hearing Research*, 42(3), 744-760.  
863 <https://doi.org/10.1044/jslhr.4203.744>
- 864 Kasambira Fannin, D., Williams, E. G., Fuller, M., Pearson, J. N., Boyd, B. A., Drame, E. R.,  
865 Taylor, J., Dickerson, A. S., Spinks-Franklin, A., & Coles-White, J. (2024). Unpacking the  
866 prevalence: A warning against overstating the recently narrowed gap for Black autistic youth.  
867 *Autism Research*, 17(6), 1072-1082. <https://doi.org/10.1002/aur.3168>
- 868 Key, K. D., Furr-Holden, D., Lewis, E. Y., Cunningham, R., Zimmerman, M. A., Johnson-  
869 Lawrence, V., & Selig, S. (2019). The continuum of community engagement in research: A  
870 Roadmap for understanding and assessing progress. *Progress in Community Health*  
871 *Partnerships: Research, Education, and Action*, 13(4), 427-434.  
872 <https://doi.org/10.1353/cpr.2019.0064>
- 873 Koegel, L. K., Bryan, K. M., Su, P. L., Vaidya, M., & Camarata, S. (2020). Definitions of  
874 nonverbal and minimally verbal in research for autism: A systematic review of the literature.  
875 *Journal of autism and developmental disorders*, 50, 2957-2972.  
876 <https://doi.org/10.1007/s10803-020-04402-w>
- 877 Koffer Miller, K. H., Cooper, D. S., Song, W., & Shea, L. L. (2022). Self-reported service needs  
878 and barriers reported by autistic adults: Differences by gender identity. *Research in Autism*  
879 *Spectrum Disorders*, 92, 101916. <https://doi.org/10.1016/j.rasd.2022.101916>

- 880 Kover, S. T., & Abbeduto, L. (2023). Toward equity in research on intellectual and  
881 developmental disabilities. *American Journal on Intellectual and Developmental Disabilities*,  
882 128(5), 350-370. <https://doi.org/10.1352/1944-7558-128.5.350>
- 883 Lardier Jr, D. T., Opara, I., Cantu, I., Garcia-Reid, P., & Reid, R. J. (2022). The Brief Sense of  
884 Community Scale: Testing dimensionality and measurement invariance by gender among  
885 Hispanic/Latinx youth. *Journal of community psychology*, 50(1), 409-425.  
886 <https://doi.org/https://doi.org/10.1002/jcop.22585>
- 887 Lardier Jr, D. T., Reid, R. J., & Garcia - Reid, P. (2018). Validation of the Brief Sense of  
888 Community Scale among youth of color from an underserved urban community. *Journal of*  
889 *community psychology*, 46(8), 1062-1074. <https://doi.org/10.1002/jcop.22091>
- 890 Laxman, D. J., Taylor, J. L., DaWalt, L. S., Greenberg, J. S., & Mailick, M. R. (2019). Loss in  
891 services precedes high school exit for teens with autism spectrum disorder: A longitudinal  
892 study. *Autism Research*, 12(6), 911-921. <https://doi.org/10.1002/aur.2113>
- 893 Levine, P., Marder, C., & Wagner, M. (2007). *Services and supports for secondary school*  
894 *students with disabilities: A special topic report from the National Longitudinal Transition*  
895 *Study-2*. SRI International.
- 896 Lewis, N. A., & Oyserman, D. (2016). Using identity-based motivation to improve the nation's  
897 health without breaking the bank. *Behavioral Science & Policy*, 2(2), 24-38.  
898 <https://doi.org/10.1353/bsp.2016.0013>
- 899 Little, R. J., & Rubin, D. B. (2019). *Statistical analysis with missing data* (Vol. 793). John Wiley  
900 & Sons.
- 901 Liu, B. M., Paskov, K., Kent, J., McNealis, M., Sutaria, S., Dods, O., Harjadi, C., Stockham, N.,  
902 Ostrovsky, A., & Wall, D. P. (2023). Racial and ethnic disparities in geographic access to  
903 autism resources across the US. *JAMA Network Open*, 6(1), e2251182.  
904 <https://doi.org/10.1001/jamanetworkopen.2022.51182>
- 905 Maenner, M. J., Warren, Z., Williams, A. R., Amoakohene, E., Bakian, A. V., Bilder, D. A.,  
906 Durkin, M. S., Fitzgerald, R. T., Furnier, S. M., & Hughes, M. M. (2023). Prevalence and  
907 characteristics of autism spectrum disorder among children aged 8 years—Autism and  
908 Developmental Disabilities Monitoring Network, 11 sites, United States, 2020. *MMWR*  
909 *Surveillance Summaries*, 72(2), 1. <https://doi.org/10.15585/mmwr.ss7201a1>
- 910 Magiati, I., Tay, X. W., & Howlin, P. (2014). Cognitive, language, social and behavioural  
911 outcomes in adults with autism spectrum disorders: A systematic review of longitudinal  
912 follow-up studies in adulthood. *Clinical psychology review*, 34(1), 73-86.  
913 <https://doi.org/10.1016/j.cpr.2013.11.002>
- 914 Major, B., & O'Brien, L. T. (2005). The social psychology of stigma. *Annual review of*  
915 *psychology*, 56, 393-421. <https://doi.org/10.1146/annurev.psych.56.091103.070137>
- 916 Manenti, M., Ferré, S., Tuller, L., Houy-Durand, E., Bonnet-Brilhault, F., & Prévost, P. (2024).  
917 Profiles of structural language and nonverbal intellectual abilities in verbal autistic adults.  
918 *Research in Autism Spectrum Disorders*, 114, 102361.  
919 <https://doi.org/10.1016/j.lingua.2023.103598>
- 920 Maye, M., Boyd, B. A., Martínez-Pedraza, F., Halladay, A., Thurm, A., & Mandell, D. S. (2021).  
921 Biases, barriers, and possible solutions: Steps towards addressing autism researchers under-  
922 engagement with racially, ethnically, and socioeconomically diverse communities. *Journal of*  
923 *autism and developmental disorders*, 1-6. <https://doi.org/10.1007/s10803-021-05250-y>

- 924 Michalski, C. A., Diemert, L. M., Helliwell, J. F., Goel, V., & Rosella, L. C. (2020). Relationship  
925 between sense of community belonging and self-rated health across life stages. *SSM*  
926 *Population Health*, 12, 100676. <https://doi.org/10.1016/j.ssmph.2020.100676>
- 927 Musgrove, M. (2015). *Speech and language services for students with autism spectrum disorder*  
928 *- Individuals with Disability Education Act*. Office of Special Education Programs. Retrieved  
929 May 24 from [https://sites.ed.gov/idea/idea-files/osep-dear-colleague-letter-on-speech-and-](https://sites.ed.gov/idea/idea-files/osep-dear-colleague-letter-on-speech-and-language-services-for-students-with-autism-spectrum-disorder/)  
930 [language-services-for-students-with-autism-spectrum-disorder/](https://sites.ed.gov/idea/idea-files/osep-dear-colleague-letter-on-speech-and-language-services-for-students-with-autism-spectrum-disorder/)
- 931 National Center for Education Statistics. (2024). *Digest of Education Statistics 2022* (NCES  
932 2024-009). I. o. E. S. U.S. Department of Education, National Center for Education Statistics.
- 933 National Institute on Minority Health and Health Disparities. (2017). *NIMHD Research*  
934 *Framework*. Retrieved September 5 from <https://nimhd.nih.gov/researchFramework>
- 935 National Institutes of Health. (2021). *NIH-wide strategic plan for fiscal years 2021-2025*.  
936 <https://www.nih.gov/sites/default/files/about-nih/strategic-plan-fy2021-2025-508.pdf>
- 937 Newman, L., Wagner, M., Huang, T., Shaver, D., Knokey, A.-M., Yu, J., Contreras, E., Ferguson,  
938 K., Greene, S., Nagle, K., & Cameto, R. (2011). *Secondary school programs and performance*  
939 *of students with disabilities: A special topic report of findings from*  
940 *the National Longitudinal Transition Study-2 (NLTS2)* (NCSE 2012-3000).
- 941 Nicolaidis, C., & Raymaker, D. (2015). Community based participatory research with  
942 communities defined by race, ethnicity, and disability: Translating theory to practice. In H.  
943 Bradbury (Ed.), *The SAGE handbook of action research* (3rd ed., pp. 167-178). SAGE  
944 Publications. <https://doi.org/10.4135/9781473921290>
- 945 O'Keefe, C. M., & Rubin, D. B. (2015). Individual privacy versus public good: protecting  
946 confidentiality in health research. *Statistics in Medicine*, 34(23), 3081-3103.  
947 <https://doi.org/10.1002/sim.6543>
- 948 Office of Management and Budget. (1997). *Revisions to the standards for the classification of*  
949 *federal data on race and ethnicity* (Federal Register Notice, Issue.  
950 [https://obamawhitehouse.archives.gov/omb/fedreg\\_1997standards](https://obamawhitehouse.archives.gov/omb/fedreg_1997standards)
- 951 Office of Management and Budget. (2024). *Revisions to OMB's Statistical Policy Directive No.*  
952 *15: Standards for Maintaining, Collecting, and Presenting Federal Data on Race and*  
953 *Ethnicity*,. (89 FR 22182). Federal Register Notice: Office of Information and Regulatory  
954 Affairs, Office of Management and Budget, Executive Office of the President, Retrieved from  
955 [https://obamawhitehouse.archives.gov/omb/fedreg\\_1997standards](https://obamawhitehouse.archives.gov/omb/fedreg_1997standards)
- 956 Onovbiona, H., Quetsch, L., & Bradley, R. (2023). Racial and practical barriers to diagnostic and  
957 treatment services for Black families of autistic youth: A mixed-method exploration. *Journal*  
958 *of Autism and Developmental Disorders*,. <https://doi.org/10.1007/s10803-023-06166-5>
- 959 Opara, I., Lardier, D. T., Garcia-Reid, P., & Reid, R. J. (2021). Testing the factor structure of the  
960 brief sense of community scale among black girls and the relationship with ethnic identity,  
961 empowerment and social support. *Children and Youth Services Review*, 127, 106095.  
962 <https://doi.org/10.1016/j.childyouth.2021.106095>
- 963 Oswald, F. (2024). Positionality statements should not force us to 'out' ourselves. *Nature Human*  
964 *Behaviour*, 1-1. <https://doi.org/10.1038/s41562-023-01812-5>
- 965 Peterson, N. A., Speer, P. W., & McMillan, D. W. (2008). Validation of a brief sense of  
966 community scale: Confirmation of the principal theory of sense of community. *Journal of*  
967 *community psychology*, 36(1), 61-73. <https://doi.org/10.1002/jcop.20217>



- 968 Pham, A. V., & Charles, L. C. (2023). Racial disparities in autism diagnosis, assessment, and  
969 intervention among minoritized youth: Sociocultural issues, factors, and context. *Current*  
970 *Psychiatry Reports*, 25(5), 201-211. <https://doi.org/10.1007/s11920-023-01417-9>  
971 Plaut, V. C. (2010). Diversity science: Why and how difference makes a difference.  
972 *Psychological Inquiry*, 21(2), 77-99. <https://doi.org/10.1080/10478401003676501>  
973 Powell, J. A. (2012). *Racing to justice: Transforming our conceptions of self and other to build*  
974 *an inclusive society*. Indiana University Press.  
975 Raven, J., Rust, J., Chan, F., & Zhou, X. (2018). *Raven's 2 Progressive Matrices, Clinical*  
976 *Edition*. Pearson.  
977 Rivera-Figueroa, K., Marfo, N. Y. A., & Eigsti, I.-M. (2022). Parental perceptions of autism  
978 spectrum disorder in Latinx and Black sociocultural contexts: A systematic review. *American*  
979 *Journal on Intellectual and Developmental Disabilities*, 127(1), 42-63.  
980 <https://doi.org/10.1352/1944-7558-127.1.42>  
981 Roid, G. H., & Pomplun, M. (2003). *The Stanford-Binet intelligence scales*. T. G. Press.  
982 Roux, A. M., Shattuck, P. T., Rast, J. E., Rava, J. A., & Anderson, K. A. (2015). *National autism*  
983 *indicators report: Transition into young adulthood*. A. J. D. A. I. Life Course Outcomes  
984 Research Program, Drexel University.  
985 Sackett, D. L., Rosenberg, W. M., Gray, J. M., Haynes, R. B., & Richardson, W. S. (1996).  
986 Evidence based medicine: What it is and what it isn't. In (Vol. 312, pp. 71-72): BMJ.  
987 Schaeffer, J., Abd El-Raziq, M., Castroviejo, E., Durrleman, S., Ferré, S., Grama, I., Hendriks, P.,  
988 Kissine, M., Manenti, M., Marinis, T., Meir, N., Novogrodsky, R., Perovic, A., Panzeri, F.,  
989 Silleresi, S., Sukenik, N., Vicente, A., Zebib, R., Prévost, P., & Tuller, L. (2023). Language in  
990 autism: Domains, profiles and co-occurring conditions. *Journal of Neural Transmission*,  
991 130(3), 433-457. <https://doi.org/10.1007/s00702-023-02592-y>  
992 Schendel, D., Roux, A. M., McGhee Hassrick, E., Lyall, K., Shea, L., Vivanti, G., Wieckowski, A.  
993 T., Newschaffer, C., & Robins, D. L. (2022). Applying a public health approach to autism  
994 research: A framework for action. *Autism Research*, 15(4), 592-601.  
995 <https://doi.org/10.1002/aur.2689>  
996 Schott, W., Nonnemacher, S., & Shea, L. (2021). Service use and unmet needs among adults with  
997 autism awaiting home- and community-based Medicaid services. *Journal of autism and*  
998 *developmental disorders*, 51(4), 1188-1200. <https://doi.org/10.1007/s10803-020-04593-2>  
999 Schott, W., Tao, S., & Shea, L. (2022). Co-occurring conditions and racial-ethnic disparities:  
1000 Medicaid enrolled adults on the autism spectrum. *Autism Research*, 15(1), 70-85.  
1001 <https://doi.org/10.1002/aur.2644>  
1002 Selin, C. M., Rice, M. L., Girolamo, T. M., & Wang, C. J. (2022). Work setting effects on  
1003 speech-language pathology practice: Implications for Identification of children with specific  
1004 language impairment. *American Journal of Speech-Language Pathology*, 31(2), 854-880.  
1005 [https://doi.org/10.1044/2021\\_AJSLP-21-00024](https://doi.org/10.1044/2021_AJSLP-21-00024)  
1006 Shattuck, P. T., Wagner, M., Narendorf, S., Sterzing, P., & Hensley, M. (2011). Post-high school  
1007 service use among young adults with an autism spectrum disorder. *Archives of pediatrics &*  
1008 *adolescent medicine*, 165(2), 141-146. <https://doi.org/10.1001/archpediatrics.2010.279>  
1009 Shriberg, L. D., Lohmeier, H. L., Campbell, T. F., Dollaghan, C. A., Green, J. R., & Moore, C. A.  
1010 (2009). A nonword repetition task for speakers with misarticulations: The Syllable Repetition  
1011 Task (SRT). [https://doi.org/10.1044/1092-4388\(2009/08-0047\)](https://doi.org/10.1044/1092-4388(2009/08-0047))  
1012 Shriberg, L. D., Strand, E. A., Jakielski, K. J., & Mabie, H. L. (2019). Estimates of the  
1013 prevalence of speech and motor speech disorders in persons with complex

- 1014 neurodevelopmental disorders. *Clinical Linguistics & Phonetics*, 33(8), 707-736.  
1015 <https://doi.org/10.1080/02699206.2019.1595732>
- 1016 Silleresi, S., Prévost, P., Zebib, R., Bonnet - Brillhault, F., Conte, D., & Tuller, L. (2020).  
1017 Identifying language and cognitive profiles in children with ASD via a cluster analysis  
1018 exploration: Implications for the new ICD - 11. *Autism Research*, 13(7), 1155-1167.  
1019 <https://doi.org/10.1002/aur.2268>
- 1020 Song, W., Salzer, M. S., Nonnemacher, S. L., & Shea, L. (2022). Lifespan service receipt and  
1021 unmet needs among individuals on the autism spectrum. *Administration and Policy in Mental  
1022 Health and Mental Health Services Research*, 49(4), 694-705. [https://doi.org/10.1007/s10488-  
1023 022-01192-4](https://doi.org/10.1007/s10488-022-01192-4)
- 1024 Sparrow, S., Carter, A., & Cicchetti, D. (1993). *Vineland screener: Overview, reliability, validity,  
1025 administration, and scoring*. Y. U. C. S. Center.
- 1026 Sparrow, S., Cicchetti, D., & Balla, D. (2005). *Vineland adaptive behavior scales, second edition  
1027 manual*. A. Publishing.
- 1028 Spearman, C. (1904). The proof and measurement of association between two things. *The  
1029 American Journal of Psychology*, 15(1), 72-101.  
1030 <https://doi.org/https://psycnet.apa.org/doi/10.2307/1412159>
- 1031 Steinbrenner, J. R., McIntyre, N., Rentschler, L. F., Pearson, J. N., Luelmo, P., Jaramillo, M. E.,  
1032 Boyd, B. A., Wong, C., Nowell, S. W., Odom, S. L., & Hume, K. A. (2022). Patterns in  
1033 reporting and participant inclusion related to race and ethnicity in autism intervention  
1034 literature: Data from a large-scale systematic review of evidence-based practices. *Autism*,  
1035 13623613211072593. <https://doi.org/10.1177/13623613211072593>
- 1036 Sterling, A. (2018). Grammar in boys with idiopathic autism spectrum disorder and boys with  
1037 fragile X syndrome plus autism spectrum disorder. *Journal of Speech, Language, and Hearing  
1038 Research*, 61(4), 857-869. [https://doi.org/10.1044/2017\\_JSLHR-L-17-0248](https://doi.org/10.1044/2017_JSLHR-L-17-0248)
- 1039 Swilley-Martinez, M. E., Coles, S. A., Miller, V. E., Alam, I. Z., Fitch, K. V., Cruz, T. H., Hohl,  
1040 B., Murray, R., & Ranapurwala, S. I. (2023). "We adjusted for race": now what? A systematic  
1041 review of utilization and reporting of race in American Journal of Epidemiology and  
1042 Epidemiology, 2020-2021. *Epidemiol Rev*, 45(1), 15-31.  
1043 <https://doi.org/10.1093/epirev/mxad010>
- 1044 Taylor, J. L., & Henninger, N. A. (2015). Frequency and correlates of service access among  
1045 youth with autism transitioning to adulthood. *Journal of autism and developmental disorders*,  
1046 45(1), 179-191. <https://doi.org/10.1007/s10803-014-2203-x>
- 1047 Thompson-Hodgetts, S., Labonte, C., Mazumder, R., & Phelan, S. (2020). Helpful or harmful? A  
1048 scoping review of perceptions and outcomes of autism diagnostic disclosure to others.  
1049 *Research in Autism Spectrum Disorders*, 77, 101598.  
1050 <https://doi.org/10.1016/j.rasd.2020.101598>
- 1051 Tomblin, J. B., Records, N. L., Buckwalter, P., Zhang, X., Smith, E., & O'Brien, M. (1997).  
1052 Prevalence of specific language impairment in kindergarten children. *Journal of Speech,  
1053 Language, and Hearing Research*, 40(6), 1245-1260. <https://doi.org/10.1044/jslhr.4006.1245>
- 1054 Turcotte, P., Mathew, M., Shea, L. L., Brusilovskiy, E., & Nonnemacher, S. L. (2016). Service  
1055 needs across the lifespan for individuals with autism. *Journal of autism and developmental  
1056 disorders*, 46(7), 2480-2489. <https://doi.org/10.1007/s10803-016-2787-4>
- 1057 Turnbull III, H. R., & Turnbull, A. P. (1998). *Free appropriate public education: The law and  
1058 children with disabilities*. Love Publishing Company.
- 1059 United States Census Bureau. (2024). *QuickFacts*. Retrieved April 19 from

- 1060 Wallerstein, N., & Duran, B. (2006). Using community-based participatory research to address  
1061 health disparities. *Health Promotion Practice*, 7(3), 312-323.  
1062 <https://doi.org/10.1177/1524839906289376>
- 1063 Wallerstein, N., & Duran, B. (2010). Community-based participatory research contributions to  
1064 intervention research: the intersection of science and practice to improve health equity.  
1065 *American journal of public health*, 100 Suppl 1(Suppl 1), S40-46.  
1066 <https://doi.org/10.2105/ajph.2009.184036>
- 1067 Wallerstein, N., & Duran, B. (2017). The theoretical, historical and practice roots of CBPR. In  
1068 Nina Wallerstein, Bonnie Duran, John G. Oetzel, & Meredith Minkler (Eds.), *Community-*  
1069 *based participatory research for health: Advancing social and health equity* (pp. 17-29).  
1070 Jossey-Bass.
- 1071 Wallerstein, N., Muhammad, M., Sanchez-Youngman, S., Rodriguez Espinosa, P., Avila, M.,  
1072 Baker, E. A., Barnett, S., Belone, L., Golub, M., Lucero, J., Mahdi, I., Noyes, E., Nguyen, T.,  
1073 Roubideaux, Y., Sigo, R., & Duran, B. (2019). Power dynamics in community-based  
1074 participatory research: A multiple-case study analysis of partnering contexts, histories, and  
1075 practices. *Health Education & Behavior*, 46(1\_Suppl), 19S-32S.  
1076 <https://doi.org/10.1177/1090198119852998>
- 1077 Wallerstein, N., Oetzel, J., Duran, B., Tafoya, G., Belone, L., & Rae, R. (2008). What predicts  
1078 outcomes in CBPR? In M. Minkler & N. Wallerstein (Eds.), *Community-based participatory*  
1079 *research for health: From process to outcomes* (Vol. 2, pp. 371-394). Jossey-Bass.
- 1080 Waltz, T. J., Powell, B. J., Fernández, M. E., Abadie, B., & Damschroder, L. J. (2019). Choosing  
1081 implementation strategies to address contextual barriers: Diversity in recommendations and  
1082 future directions. *Implementation science*, 14, 1-15. [https://doi.org/10.1186/s13012-019-0892-](https://doi.org/10.1186/s13012-019-0892-4)  
1083 [4](https://doi.org/10.1186/s13012-019-0892-4)
- 1084 Weitlauf, A. S., Miceli, A., Vehorn, A., Dada, Y., Pinnock, T., Harris, J. W., Hine, J., & Warren, Z.  
1085 (2024). Screening, diagnosis, and intervention for autism: Experiences of Black and  
1086 multiracial families seeking care. *Journal of autism and developmental disorders*, 54(3), 931-  
1087 942. <https://doi.org/10.1007/s10803-022-05861-z>
- 1088 Wiig, E. H., Semel, E., & Secord, W. (2013). *Clinical Evaluation of Language Fundamentals-5th*  
1089 *Ed.*
- 1090 Williams, E.-D. G., Smith, M. J., & Boyd, B. (2023). Perspective: The role of diversity advisory  
1091 boards in autism research. *Autism*, 27(3), 864-869.  
1092 <https://doi.org/10.1177/13623613221133633>
- 1093 Williams, K. T. (2019). *Expressive Vocabulary Test-Third Edition: Manual*. Pearson.
- 1094 Wilton, L. S., Bell, A. N., Vahradyan, M., & Kaiser, C. R. (2020). Show don't tell: Diversity  
1095 dishonesty harms racial/ethnic minorities at work. *Personality and Social Psychology Bulletin*,  
1096 46(8), 1171-1185. <https://doi.org/10.1177/0146167219897149>
- 1097 Wolfson, A. M., Doctor, J. N., & Burns, S. P. (2000). Clinician judgments of functional outcomes:  
1098 How bias and perceived accuracy affect rating. *Archives of physical medicine and*  
1099 *rehabilitation*, 81(12), 1567-1574. <https://doi.org/10.1053/apmr.2000.16345>
- 1100 World Health Organization. (2022). *International Classification of Diseases (ICD)-11*.  
1101 <https://icd.who.int/en>

1102  
1103  
1104  
Figure Legend

- 1105 1. Frequencies of participants reporting the number of services received and unmet service  
1106 needs



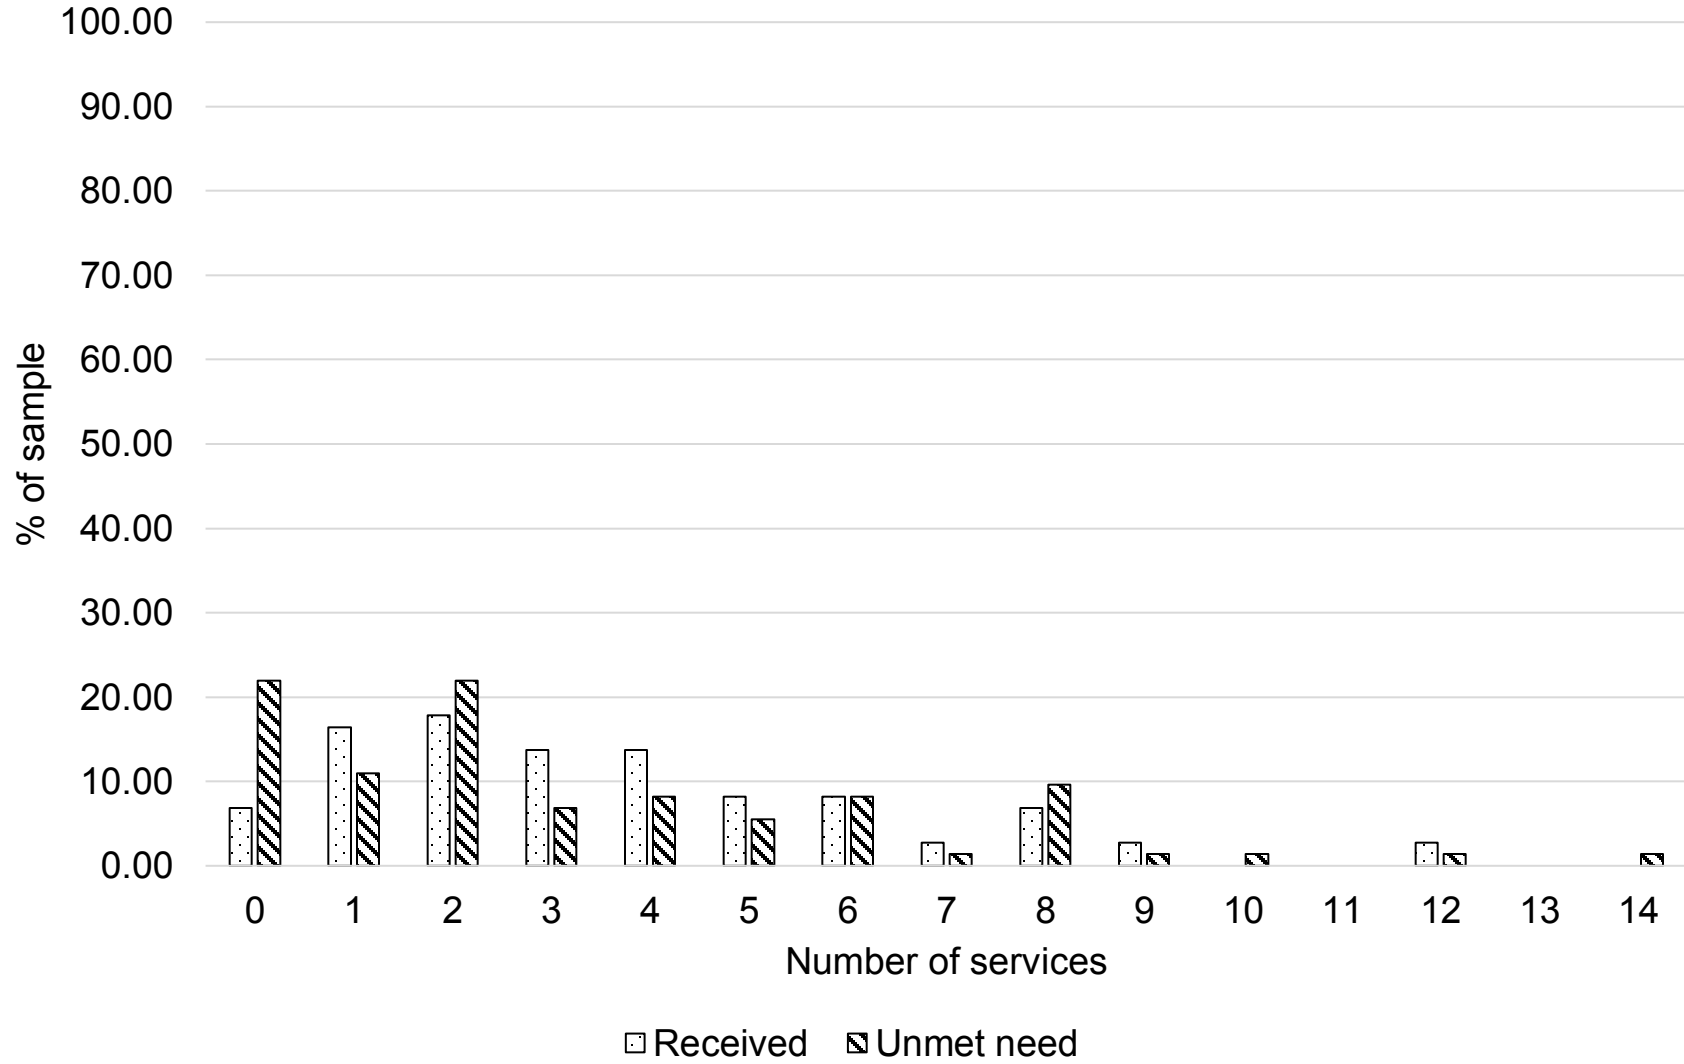

Source: https://medrxiv.org/content/medrxiv/early/2024/10/11/2024.05.26.24307944.full.pdf
